1 Transcriptomic Evidence for Reproductive Suppression in Male *Peromyscus eremicus* (Cactus Mouse)  
2 Subjected to Acute Dehydration

3

4 Lauren Kordonowy<sup>1\*</sup> and Matthew MacManes<sup>1+</sup>

5 1. University of New Hampshire Department of Molecular Cellular and Biomedical Sciences  
6 Durham, NH, USA

7 \* [lauren.kordonowy@unh.edu](mailto:lauren.kordonowy@unh.edu)

8 + [matthew.macmanes@unh.edu](mailto:matthew.macmanes@unh.edu)

9

10 **Corresponding Author:**

11 Lauren Kordonowy

12 University of New Hampshire

13 Rudman Hall (MCBS)

14 46 College Road

15 Durham, NH, 03824

16 [lauren.kordonowy@unh.edu](mailto:lauren.kordonowy@unh.edu)

17 **Abstract**

18 Understanding how organisms adapt to extreme environments is an outstanding question facing  
19 evolutionary biologists. Research related to a specific example of adaptation, mammals in desert  
20 environments, has focused on survival, while questions related to the reproductive effects of dehydration  
21 have been largely ignored. Here, we explore the reproductive consequences of acute dehydration by  
22 utilizing RNAseq data in the desert-specialized rodent, *Peromyscus eremicus*. Nine genes were  
23 consistently differentially expressed between hydrated and dehydrated mice, a low number which aligns  
24 with current perceptions of this species' extreme desert specialization. However, these differentially  
25 expressed genes include Insulin-like 3 (Insl3), a regulator of male fertility, as well as Slc45a3 and Slc38a5,  
26 both of which interact with genes with important roles in reproductive function. Together, these findings  
27 suggest that acute dehydration is linked to reproductive mitigation, a result which is unexpected in an  
28 animal capable of surviving and successfully reproducing without available external water sources.

29

30

31

32

### 33 **Introduction**

34 Populations native to particular environments are believed to possess physiological, behavioral  
35 and ecological adaptations that enable their long term persistence. For decades, evolutionary biologists  
36 have successfully described examples where natural selection has resulted in the exquisite match between  
37 organism and environment (*e.g.* Salinity adaptations in three-spine sticklebacks: Hohenlohe et al., 2010;  
38 Jones et al. 2012; high-altitude adaptations for hemoglobin: Storz et al., 2010, Lorenzo et al., 2015; and  
39 *Peromyscus* adaptations for multiple environments: Hoekstra et al., 2006; Bedford & Hoekstra, 2015;  
40 Munshi-South & Richardson, 2016). The match between organism and environment has largely been  
41 studied in the context of one component of fitness – survival – while the other component, reproductive  
42 success, has received negligible attention in the context of environmental adaptations (but see Kordonowy  
43 & MacManes, 2016). However, this frequently neglected aspect of selection is critical to long term  
44 persistence in a given environment. While substantial research has been done on the effects of various  
45 types of stress on reproduction (*e.g.* Wingfield & Sapolsky, 2003; Ahmed et al., 2015; Nargund, 2015;  
46 Wingfield, 2013), the impacts of dehydration stress on reproduction in extreme environmental specialists  
47 have not been studied. Habitat specialists must possess phenotypes enabling survival and successful  
48 reproduction; therefore, cases where environmental selective pressures result in reduced reproductive  
49 success (*e.g.* Martin & Wiebe, 2004; Bolger, Patten & Bostock, 2005; Evans et al., 2010; Wingfield,  
50 Kelley & Angelier, 2011), but not survival, demand attention. Species occupying extreme environments  
51 are likely more vulnerable to the bifurcation of these two components of fitness. Moreover, long-term  
52 events like global climate change are predicted to increase climate variability and may enhance the  
53 challenges faced by species living on the fringes of habitable environments (Martin & Wiebe, 2004;  
54 Somero, 2010; Wingfield, Kelley & Angelier, 2011; Wingfield, 2013; Asres & Amha, 2014).

55 Deserts present extraordinary environmental impediments for habitation, including extreme heat,  
56 aridity, and solar radiation. Examples of well-described desert mammal behavioral adaptations are  
57 seasonal torpor (reviewed in Kalabukhov 1960; Geiser, 2010), nocturnality (*e.g.* Stephens & Tello, 2009;  
58 Fuller et al., 2014) and burrowing (reviewed in Vorhies, 1945; Kelt, 2011) to avoid high temperatures and  
59 sun exposure. Desert mammals also exhibit a wide range of morphological adaptations, including large  
60 ears for effective heat dissipation (*e.g.* Schmidt-Nieslen, 1964; Hill & Veghte, 1976), metabolic water  
61 production (*e.g.* MacMillen & Hinds, 1983; reviewed in Walsberg 2000), and renal adaptations to  
62 minimize water-loss (*e.g.* Schmidt-Nielsen et al., 1948; Dantzler, 1982; Diaz, Ojeda & Rezenda, 2006).

63 Although desert rodents must possess adaptations conferring survival *and* reproductive benefits,  
64 researchers have focused exclusively on their adaptations for survival. For example, renal adaptations in  
65 species of Kangaroo rats (*Dipodomys* species) have been described and explored for over 60 years  
66 (Schmidt-Nielsen et al., 1948; Schmidt-Nielsen and Schmidt-Nielsen, 1952; Marra et al., 2012; Urity et  
67 al., 2012). While early research determined the renal physiology for Kangaroo rats (Schmidt-Nielsen et  
68 al., 1948; Schmidt-Nielsen and Schmidt-Nielsen, 1952; Vimtrup and Schmidt-Nielsen), recent research  
69 has focused on the genetic underpinnings of this phenotype (Marra et al., 2012; Urity et al., 2012; Marra,  
70 Romero & DeWoody, 2014; Marra et al., 2014), which is indicative of a larger methodological shift in  
71 the approach for examining adaptation.

72 Research in another desert-adapted rodent, *Peromyscus eremicus* (cactus mouse), has followed a  
73 somewhat different trajectory; however, it too has only pursued survival oriented mechanisms (but see  
74 Kordonowy and MacManes, 2016). The ecology, physiology and behaviors of the cactus mouse in  
75 comparison with other *Peromyscus* species were summarized in 1968 (King, ed.), and the relationships  
76 between basal metabolic rate, body mass, and evaporative water loss were reviewed several decades later  
77 (MacMillen and Garland, 1989). Known desert adaptations for cactus mouse include nocturnality and  
78 torpor (reviewed in Veal and Caire, 1979); however, the cactus mouse does not possess the same elaborate  
79 kidney structures responsible for renal adaptations in kangaroo rats (Dewey, Elias & Appel, 1966;  
80 MacManes 2016, *unpublished data*). The physiological renal adaptations in *P. eremicus* have not been  
81 described in detail, despite considerable explorations of other aspects of this species' biology (reviewed  
82 in Veal and Caire, 1979). In order to initially characterize renal function of the cactus mouse, water  
83 consumption measurements and electrophysical dehydration effects for this species have also recently  
84 been documented (Kordonowy et al., 2016). Because the renal mechanisms for mitigating renal water-  
85 loss in *P. eremicus* have not been determined, a comparative genetic approach may be instrumental for  
86 characterizing this species' adaptive kidney phenotype. To this end, MacManes and Eisen (2014)  
87 conducted a comparative analysis to find genes expressed in the kidney tissue of cactus mouse that were  
88 under positive selection relative to other mammals. Furthermore, the transcriptomic resources available  
89 for this species extend considerably beyond renal tissue; transcripts from cactus mouse (as well as  
90 numerous other *Peromyscus* species) have been heavily utilized to pursue questions related to multiple  
91 aspects of evolutionary biology (reviewed in Bedford and Hoekstra, 2015; Munshi-South and Richardson,  
92 2016). Current investigations into cactus mouse desert-adaptive physiology include transcriptomic

93 analyses; however, we extend this genetic approach by shifting the focus from adaptations for survival to  
94 include adaptations for reproductive success.

95 In nature, wild cactus mice are subjected to both acute and chronic dehydration, and understanding  
96 the reproductive effects of dehydration stress is an initial step for fully characterizing the suite of  
97 phenotypes enabling successful reproduction. Given that this species has evolved in southwestern United  
98 States deserts, we predicted that neither acute nor chronic water stress, while physiologically demanding,  
99 would be associated with reproductive suppression. To test these predictions, we leveraged previous  
100 research that characterized the transcriptome of male *P. eremicus* reproductive tissues from functional and  
101 comparative perspectives (Kordonowy and MacManes, 2016). We extend upon this work by performing  
102 an RNAseq experiment to identify differentially expressed genes in testes between male *P. eremicus*  
103 subjected to acute dehydration versus control (fully hydrated) animals in order to determine the impacts,  
104 if any, on male fertility. We pursue this line of research on the effects of dehydration on reproduction in  
105 cactus mouse in order to begin to address the need for studies focusing on adaptation related to  
106 reproductive success in animals living in extreme, and changing, environments.

107

## 108 **Methods**

### 109 *Treatment Groups, Sample Preparation and mRNA Sequencing*

110 The *cactus mice* used for this study include only captive born individuals purchased from the  
111 *Peromyscus* Genetic Stock Center (Columbia, South Carolina). The animals, originally collected from a  
112 hot-desert location in Arizona, have been housed for several generations, at the University of New  
113 Hampshire in conditions that mimic temperature and humidity levels in southwestern US deserts, as  
114 described previously (Kordonowy & MacManes, 2016). Males and females are housed together, which  
115 provides olfactory cues to support reproductive maturation. Males do not undergo seasonal testicular  
116 atrophy, as indicated by successful reproduction throughout the year. The individuals used in this study  
117 were deemed reproductively mature once they became scrotal.

118 Males that were provided with water *ad libidum* had free access to water prior to euthanasia, and  
119 these individuals are labeled as WET mice in our analyses. Mice that were water deprived, which we refer  
120 to as DRY mice, were weighed and then water deprived for ~72 hours directly prior to euthanasia. All

121 mice were weighed prior to sacrifice, and DRY mice were evaluated for weight loss during dehydration.  
122 Individuals in the study were collected between September 2014 – April 2016.

123 Cactus mice were sacrificed via isoflurane overdose and decapitation in accordance with  
124 University of New Hampshire Animal Care and Use Committee guidelines (protocol number 130902) and  
125 guidelines established by the American Society of Mammalogists (Sikes et al., 2016). Trunk blood  
126 samples were collected following decapitation for serum electrolyte analyses with an Abaxis Vetscan VS2  
127 using critical care cartridges (Abaxis). The complete methodology and results of the electrolyte study, as  
128 well as the reported measures of water consumption and weight loss due to dehydration are described fully  
129 elsewhere (Kordonowy et al., 2016). Rather, this study focused on differential gene expression between  
130 the testes of 11 WET and 11 DRY mice. Testes were harvested within ten minutes of euthanasia, placed  
131 in RNAlater (Ambion Life Technologies), flash-frozen in liquid nitrogen, and stored at -80° degree  
132 Celsius. A TRIzol, chloroform protocol was implemented for RNA extraction (Ambion Life  
133 Technologies). Finally, the quantity and quality of the RNA product was evaluated with both a Qubit 2.0  
134 Fluorometer (Invitrogen) and a TapeStation 2200 (Agilent Technologies, Palo Alto, USA).

135 Libraries were made with a TruSeq Stranded mRNA Sample Prep LT Kit (Illumina), and the  
136 quality and quantity of the resultant sequencing libraries were confirmed with the Qubit and TapeStation.  
137 Each sample was ligated with a unique adapter for identification in multiplex single lane sequencing. We  
138 submitted the multiplexed samples of the libraries for processing on lanes at the New York Genome Center  
139 Sequencing Facility (NY, New York). Paired end sequencing reads of length 125bp were generated on an  
140 Illumina 2500 platform. Reads were parsed by individual samples according to their unique hexamer IDs  
141 in preparation for analysis.

#### 142 *Assembly of Testes Transcriptome*

143 We assembled a testes transcriptome from a single reproductively mature male using the *de novo*  
144 transcriptome protocol described previously (MacManes, 2016). The testes transcripts were assembled  
145 with alternative methodologies utilizing several optimization procedures to produce a high-quality  
146 transcriptome; however, the permutations of this assembly process are described extensively elsewhere  
147 (MacManes, 2016; Kordonowy and MacManes, 2016). The testes transcriptome we selected was  
148 constructed as described below. The raw reads were error corrected using Rcorrector version 1.0.1 (Song  
149 & Florea, 2015), then subjected to quality trimming (using a threshold of PHRED <2, as per MacManes  
150 2014) and adapter removal using Skewer version 0.1.127 (Jiang et al, 2014). These reads were then

151 assembled in the *de novo* transcriptome assembler BinPacker version 1.0 (Liu et al., 2016). We also  
152 reduced sequence redundancy to improve the assembly using the sequence clustering software CD-HIT-  
153 EST version 4.6 (Li & Godzik, 2006; Fu et al., 2012). We further optimized the assembly with Transrate  
154 version 1.0.1 (Smith-Unna et al., 2015) by retaining only highly supported contigs. We then evaluated the  
155 assembly's structural integrity with Transrate and assessed completeness using the vertebrata database in  
156 BUSCO version 1.1b1 (Simão et al., 2015). We quasimapped the raw reads to the assembly with Salmon  
157 version 0.7.2 (Patro, Duggal & Kingsford, 2015) to confirm that mapping rates were high. Finally, the  
158 assembly was also annotated in dammit version 0.3.2, which finds open reading frames with TransDecoder  
159 and uses five databases (Rfam, Pfam, OrthoDB, BUSCO, and Uniref90) to thoroughly annotate transcripts  
160 (<https://github.com/camillescott/dammit>).

### 161 *Differential Gene and Transcript Expression Analyses*

162 Several recent studies have critically evaluated alternative methodologies for differential transcript  
163 and gene expression to determine the relative merits of these approaches (Gierlinski et al., 2015; Schurch  
164 et al., 2016; Sonesson, Love & Robinson, 2016; Froussios et al., 2016). Sonesson and colleagues (2016)  
165 demonstrated that differential gene expression (DGE) analyses produce more accurate results than  
166 differential transcript expression (DTE) analyses. Furthermore, the differential gene expression approach  
167 is more appropriate than differential transcript expression for the scope of our research question, which is  
168 true of many evolutionary genomic studies (Sonesson et al., 2016). However, because both DTE and DGE  
169 approaches are widespread in current literature, we deemed it important to confirm that these  
170 methodologies yielded concordant results in the current study.

171 We utilized edgeR (Robinson, McCarthy & Smith, 2010; McCarthy, Chen & Smith, 2012) as our  
172 primary statistical software because Schurch and colleagues (2016) rigorously tested various packages for  
173 analyzing DGE, and edgeR performed optimally within our sample size range. While edgeR is a widely  
174 used statistical package for evaluating differential expression, we also confirmed our results with another  
175 popular package, DESeq2 (Love, Huber & Anders, 2014), in order to validate our findings.

176 We performed differential expression analyses with three alternative methodologies. Two analyses  
177 were conducted in R version 3.3.1 (R Core Team, 2016) using edgeR version 3.16.1, a Bioconductor  
178 package (release 3.4) that evaluates statistical differences in count data between treatment groups  
179 (Robinson, McCarthy & Smith, 2010; McCarthy, Chen & Smith, 2012). Our first method utilized  
180 tximport, an R package developed by Sonesson and colleagues (2016), which incorporates transcriptome

181 mapping-rate estimates with a gene count matrix to enable downstream DGE analysis. The authors assert  
182 that such transcriptome mapping can generate more accurate estimates of DGE than traditional pipelines  
183 (Soneson et al, 2016). While our first methodology evaluated differential gene expression, our second  
184 analysis used the transcriptome mapped read sets to perform differential transcript expression and identify  
185 the corresponding gene matches. The purpose of this second analysis was to evaluate whether the  
186 transcript expression results coincided with the gene expression results produced by the same program,  
187 edgeR. Finally, our third methodology determined differential gene expression with tximport in  
188 conjunction with DESeq2 version 1.14.0 (Love, Huber & Anders, 2014), a Bioconductor package (release  
189 3.4) which also evaluates statistical differences in expression. We performed this alternative DGE analysis  
190 with DESeq2 in order to corroborate our DGE results from edgeR. Thus, the results for all three  
191 differential expression analyses were evaluated to determine the coincidence among the genes identified  
192 as significantly different between the WET and DRY groups. These alternative differential expression  
193 methods are described in detail below.

194 We quasimapped each of the 11 WET and 11 DRY sample read sets to the testes transcriptome  
195 with Salmon version 0.7.2 to generate transcript count data. To perform the gene-level analysis in edgeR,  
196 we constructed a gene ID to transcript ID mapping file, which was generated by a BLASTn (Altschul et  
197 al., 1990; Madden, 2002) search for matches in the *Mus musculus* transcriptome (ensembl.org) version  
198 7/11/16 release-85. We then imported the Salmon-generated count data and the gene ID to transcript ID  
199 mapping file into R using the tximport package (Soneson et al. 2016) to convert the transcript count data  
200 into gene counts. This gene count data was imported into edgeR for differential gene expression analysis  
201 (Robinson, McCarthy & Smith, 2010; McCarthy, Chen & Smith, 2012). We applied TMM normalization  
202 to the data, calculated common and tagwise dispersions, and performed exact tests ( $p < 0.05$ ) adjusting  
203 for multiple comparisons with the Benjamini-Hochburg correction (Benjamini & Hochburg, 1995) to find  
204 differentially expressed genes, which we identified in Ensembl (ensemble.org).

205 Next, we performed a transcript-level analysis using edgeR. To accomplish this, the Salmon-  
206 generated count data was imported into R and analyzed as was described above for the gene-level analysis  
207 in edgeR. After determining which transcript IDs were differentially expressed, we identified the  
208 corresponding genes using the gene ID to transcript ID matrix described previously. The significantly  
209 expressed transcripts without corresponding gene matches were selected for an additional BLASTn search  
210 in the NCBI non-redundant nucleotide database (<http://blast.ncbi.nlm.nih.gov/Blast.cgi>). However, these



211 results were not subjected to any additional analyses, because these matches were not consistent across all  
212 three differential expression analyses. This list of BLASTn search matches is provided in supplementary  
213 materials (DTEno-matchBLASTnSequences.md).

214 The third analysis used DESeq2 to conduct an additional gene-level test, using the same methods  
215 as described for the previous gene-level analysis, with the exception that data were imported into an  
216 alternative software package. We determined the significantly differentially expressed genes ( $p < 0.05$ )  
217 based on normalized counts and using the Benjamini-Hochburg correction (Benjamini & Hochburg, 1995)  
218 for multiple comparisons. We only retained genes with a  $-1 < \log_2 \text{fold change} > 1$  in order to filter genes  
219 at a conservative threshold for differential expression based on our sample size (Schurch et al., 2016).  
220 This filtering was not necessary for either of the edgeR analyses because  $\log_2$  fold changes exceeded this  
221 threshold for the differentially expressed genes and transcripts ( $-1.3 < \log_2 \text{fold change} > 1.4$ , in all cases).

222 We also compared the  $\log_2$  fold change values (of treatment differences by mapped count) for each  
223 gene from the edgeR and DESeq2 gene-level analyses in a linear regression. This statistical test was  
224 performed in order to evaluate the degree of concordance between the two DGE analyses. Furthermore,  
225 we constructed a list of genes identified as differentially expressed by all three analyses, which were  
226 further evaluated for function as well as chromosomal location. These genes were also explored in  
227 STRING version 10.0 (string-db.org) to determine their protein-protein interactions (Snel et al., 2000;  
228 Szklarczyk et al., 2015).

229

## 230 **Results**

### 231 *Data and Code Availability*

232 The testes transcriptome was assembled from a 45.8 million paired read data set. Additionally,  
233 there were 9-20 million paired reads for each of the 22 testes data sets used for the differential expression  
234 analysis (**Supplemental 1**), yielding 304,466,486 reads total for this analysis. The raw reads are available  
235 at the European Nucleotide Archive under study accession number PRJEB18655. All data files, including  
236 the testes un-annotated transcriptome, the dammit annotated transcriptome, and the data generated by the  
237 differential gene expression analysis (described below) are available on DropBox  
238 (<https://www.dropbox.com/sh/ffr9xrmjxj9mdl1m/AACpxjQNn-Jlf25qNds1fRSCa?dl=0>). These files will

239 be posted to Dryad upon manuscript acceptance. All code for these analyses is posted on GitHub  
240 (<https://github.com/macmanes-lab/testesDGE>).

#### 241 *Assembly of Testes Transcriptome*

242 The performance of multiple transcriptome assemblies was evaluated thoroughly, and the selected  
243 optimized testes assembly met high quality and completeness standards, and it also contains relatively few  
244 contigs and has high read mapping rates (**Table 1**). Therefore, this transcriptome was used for our  
245 differential expression analyses. The transcriptome was also annotated, and the complete statistics for this  
246 dammit annotation are provided in **Table 2**.

#### 247 *Differential Gene and Transcript Expression Analyses*

248 Salmon quasimapping rates of all read datasets to the assembly were sufficiently high (range:  
249 81.46% - 87.02%; **Supplemental 1**), indicating the successful generation of transcript count data for our  
250 differential expression analyses. The exact test performed for our gene-level analysis in edgeR indicated  
251 that fifteen genes reached statistical significance (after adjusting for multiple comparisons) for DGE  
252 between the WET and DRY treatment groups (**Figure 1**). Specifically, seven genes were more highly  
253 expressed in WET individuals, and eight genes were more highly expressed in DRY individuals (**Table**  
254 **3**).

255 We also performed an alternative transcript-level analysis using the referenced transcriptome  
256 mapped reads exclusively with edgeR. The exact test found 66 differentially expressed transcripts (**Figure**  
257 **2**), 45 of which were more highly expressed in the WET group, and 21 were more highly expressed in the  
258 DRY group (**Table 4**). 10 of these differentially expressed transcripts were consistent with differentially  
259 expressed genes from the edgeR DGE analysis. In addition, the significantly expressed transcripts without  
260 an Ensembl ID match (nine WET and nine DRY) were retrieved for performing an nt all species BLASTn  
261 search (<http://blast.ncbi.nlm.nih.gov/Blast.cgi>), and these results are in the supplementary materials.

262 The gene-level analysis conducted in DESeq2 yielded 215 significantly differentially expressed  
263 genes (**Figure 3**), 67 of which were more highly expressed in the WET group, while 148 were highly  
264 expressed in the DRY group. However, only 20 of these genes remained when we filtered them with a -1  
265  $< \log_2 \text{fold change} > 1$  to retain genes with a conservative threshold difference between treatment groups.  
266 This list of 20 genes yielded 16 genes more highly expressed in WET mice and four genes highly

267 expressed in DRY mice (**Table 5**). Nine of these genes overlapped with those found to be significant in  
268 the previous two edgeR analyses.

269 To evaluate the correlation of  $\log_2$  fold change results for each gene (Ensembl ID) from the two  
270 DGE analyses (EdgeR and DESeq2), we performed a regression of these log values, and they were  
271 significantly correlated (**Figure 4**:  $\text{Adj-R}^2 = 0.6596$ ;  $F(1,14214) = 2.754 \times 10^4$ ;  $p < 2.2 \times 10^{-16}$ ). This further  
272 demonstrates the concordance of the DGE analyses in these two software packages.

273 To evaluate the degree to which the three analyses produced concordant results, we generated a  
274 list of genes which were found to be significantly differently expressed by treatment across all three  
275 analyses (**Supplemental 2**). There were six genes that were consistently highly-expressed in the WET  
276 group and three genes that were highly-expressed in the DRY group. The six highly-expressed WET genes  
277 are Insulin-like 3 (Insl3), Free-fatty acid receptor 4 (Ffar4), Solute carrier family 45 member 3 (Slc45a3),  
278 Solute carrier family 38 member 5 (Slc38a5), Integrin alpha L (Itgal), and Transferrin (Trf). The three  
279 highly-expressed DRY genes are Ras and Rab Interactor 2 (Rin2), Insulin-like growth factor binding  
280 protein 3 (Igfbp3), and Connective tissue growth factor (Ctgf). Because the patterns of expression of these  
281 nine genes were corroborated by multiple methodologies, we are confident that they are differentially  
282 expressed between our treatments. Estimates of expression for these genes generated using the gene-level  
283 edgeR analysis are plotted in **Figure 5**.

284 The significantly differently expressed genes were evaluated for gene function and chromosomal  
285 location (**Table 6**). These genes occur throughout the genome; namely, they are located on different  
286 chromosomes. The diverse functions of each gene will be described below. In addition, we generated  
287 STRING diagrams ([string-db.org](http://string-db.org)) to view the protein-protein interactions for each of these nine genes  
288 (Snel et al., 2000; Szklarczyk et al., 2015).

289 Slc38a5 and Slc45a3 are among the highly expressed genes in the WET group (they have lower  
290 expression in the DRY group); these two solute carriers are members of a large protein family that is  
291 responsible for cross-membrane solute transport (reviewed in Hediger et al., 2004; Hediger et al., 2013;  
292 Cesar-Razquin et al., 2015). Slc38a5 is involved sodium-dependent amino-acid transport, while Slc45a3  
293 is purported to transport sugars (Vitavska and Wieczorek, 2013; Schiöth, et al., 2013;  
294 <http://slc.bioparadigms.org/>), thereby playing an important potential role in maintaining water balance via  
295 management of oncotic pressures. Slc38a5 (**Figure 6a**) has interactions with multiple additional solute  
296 carriers, including Slc1a5, Slc36a2, Slc36a3, and Slc36a4. Slc38a5 also has an interaction with disintegrin

297 and metalloproteinase domain-containing 7 (Adam7), which is involved in sperm maturation and the  
298 acrosome reaction (Oh et al., 2005). In contrast, Slc45a3 (**Figure 6b**) does not have known protein  
299 interactions with other solute carriers; however, this protein does interact with steroidogenic acute  
300 regulatory protein (StAR), which is critical in steroidogenesis (Christenson and Strauss III, 2001).

301         Insl3 was lower expressed in the DRY group, and this hormone regulates fertility in male and  
302 female mammals, by preventing apoptosis of germ cells in reproductive organs of both sexes (Kawamura  
303 et al., 2004; Bathgate et al., 2012; Bathgate et al., 2013). In male rodents, Insl3 is critical to development  
304 by facilitating testicular descent, and it is also present in testes of adults, where it binds to relaxin family  
305 peptide receptor 2 (RXFP2), also known as Lrg8 (Bathgate et al., 2012; Bathgate et al., 2013). Within  
306 adult rodent testes, luteinizing hormone (LH) stimulates expression of Insl3 in Leydig cells, and Insl3  
307 binds to Lrg8 in seminiferous tubules, which results in inhibited apoptosis of germ-line cells, thus  
308 increasing their availability (Kawamura et al., 2004). Therefore, our finding of lower Insl3 expression in  
309 DRY mice indicates less attenuation of germ-line cell apoptosis, which could result in the reduction of  
310 sperm cells and lower fertility. Protein interaction data for Insl3 (**Figure 6c**) indicate that this hormone  
311 interacts with RXFP2 and RFXP1, as well as other proteins, including leptin (Lep), a pleiotropic hormone  
312 involved in reproduction, immunity, and metabolism (reviewed in Friedman, 2014).

313         Ffar4 was also down-regulated in the DRY group. Omega-3 fatty acid receptor 1 (O3Far1) is an  
314 alias of Ffar4, and it has roles in metabolism and inflammation (Moniri, 2016). This protein interacts with  
315 multiple other free fatty acid receptors and G-protein coupled receptors as well as Stanniocalcin 1 (Stc1)  
316 (**Figure 6d**). Stc1 is involved in phosphate and calcium transportation (Wagner and Dimattia, 2006);  
317 however, this protein's functional role in mice remains enigmatic (Chang et al, 2005).

318         Another of the lower expressed DRY group genes is Itgal (also known as CD11a), which has  
319 multifaceted roles in lymphocyte-mediated immune responses (Bose et al., 2014). Concordantly, the  
320 protein interactions with Itgal (**Figure 6e**) include numerous proteins integral to immunity, such as  
321 Intracellular adhesion molecules (specifically, ICAM1,2,4), which are expressed on the cell surface of  
322 immune cells and endothelial cells. Itgal is a receptor for these ICAM glycoproteins, which bind during  
323 immune system responses (reviewed in Albelda, Smith and Ward, 1994). However, an additional role of  
324 intercellular adhesion molecules has been proposed in spermatogenesis, whereby ICAMs may be integral  
325 to transporting non-mobile developing sperm cells through the seminiferous epithelium (Xiao, Mruk and  
326 Cheng, 2013).

327 The final gene with lower expression levels in the DRY treatment is Trf, which modulates the  
328 amount of free-iron in circulation and binds to transferrin receptors on the surface of erythrocyte  
329 precursors to deliver iron (reviewed in Gkouvastos Papanikolaou and Pantopoulos, 2012). TRF interacts  
330 with multiple proteins (**Figure 6f**) involved in iron transport and uptake, including STEAP family member  
331 3 (Steap3), hephaestin (HEPH), ceruloplasmin (Cp), Solute carrier protein 40 member 1 (Slc40a1), and  
332 several H<sup>+</sup> ATPases. Furthermore, TRF is linked to apolipoprotein A-1 (Apoa1), which interacts with  
333 immunoglobulin in a complex named sperm activating protein (SPAP) to activate the motility of sperm  
334 when it inhabits the female genital tract (Akerlof et al., 1991; Leijonhufvud, Akerlof and Pousette, 1997).

335 One of the highly expressed genes in the DRY group is Rin2, which is involved in endocytosis  
336 (reviewed in Doherty and McMahon, 2009) and membrane trafficking through its actions as an effector  
337 protein for the GTPases in the Rab family within the Ras superfamily (reviewed in Stenmark and  
338 Olkkonen, 2001). Rin2 protein-protein interactions (**Figure 7a**) include Ras related protein Rab5a and  
339 Rab5b, which are involved in vesicle transport as well as vasopressin-regulated water reabsorption. This  
340 mechanism for water reabsorption via Aquaporin 2 (AQP2) in the kidney has been thoroughly reviewed  
341 by Boone and Deen (2008) and Kwon and colleagues (2013).

342 The second gene highly expressed in the DRY group is Igfbp3, which modulates the effects of  
343 insulin growth factors. Thus, the protein directly interacts (**Figure 7b**) with insulin growth factors 1 and  
344 2 (Igf1, Igf2), which are responsible for increasing growth in most tissues (reviewed in le Roth 1997;  
345 Jones and Clemmons, 2008). Ctgf was also highly expressed in the DRY group, and this protein is  
346 responsible for increased fibrosis and extracellular matrix formation (Reviewed in Moussad and  
347 Brigstock, 2000). The protein interactions for Ctgf (**Figure 7c**) include many transcription activators in  
348 the Hippo signaling pathway, including multiple TEA domain transcription factors (Tead1, 2, 3 and 4),  
349 WW domain containing transcription regulator 1 (Wwtr1), as well as Yes-associated protein 1 (Yap1),  
350 which is responsible for both increasing apoptosis and preventing cell proliferation to mitigate tumor  
351 growth and control organ size (Reviewed in Pan, 2010).

352

## 353 **Discussion**

354 This is the first study to evaluate the reproductive correlates of acute dehydration in a desert-  
355 specialized rodent. We analyzed differential gene expression levels for testes in male *Peromyscus*

356 *eremicus* (cactus mouse) in acute dehydration (DRY) versus a control group that was fully hydrated  
357 (WET). Our results provide evidence suggesting that reproductive function is attenuated in acutely  
358 dehydrated mice, which is surprising, given that this is not consistent with our understanding of *P.*  
359 *eremicus* as a desert specialist. While acute dehydration is less common than chronic dehydration for  
360 desert mammals, it is a selective force they must overcome. Indeed, throughout much of the described  
361 range of the cactus mouse, rainfall events may occur several times per year. Cactus mice, and many other  
362 rodents, are known to rehydrate during these rainfall events (MacManes, *personal observation*). Following  
363 rehydration, cactus mice experience acute dehydration, followed by a steady state of chronic dehydration.

364 In male *P. eremicus*, we found strong evidence for reproductive suppression via down-regulation  
365 of the *Insl3* gene in acutely dehydrated animals. *Insl3*, which is a hormonal regulator of fertility among  
366 mammals of both sexes, is known to inhibit germ line apoptosis in the testes (Kawamura et al., 2004;  
367 Bathgate et al., 2012; Bathgate et al., 2013). Specifically, the binding of *Insl3* to *Lrg8* in rodent testes  
368 decreases the apoptosis of germ-line cells, which increases sperm availability (Kawamura et al., 2004).  
369 Lower *Insl3* expression in the testes of acutely dehydrated mice suggests that fertility may be attenuated  
370 due to acute water deprivation. Although the current study suggests reproductive suppression in acute  
371 dehydration, future work characterizing the functional consequences of *Insl3* down-regulation is needed.  
372 Specifically, does the number or quality of sperm decrease, and does this decrease reduce the probability  
373 of successful fertilization? Moreover, what are the temporal dynamics of reproductive suppression?  
374 Logically, desert species with core reproductive functions that are suppressed by dehydration seem likely  
375 to be rapidly outcompeted. Given this assertion, research characterizing the reproductive correlates of  
376 chronic dehydration is a logical extension of this work, although doing so here is beyond the scope of this  
377 study.

378 Solute carrier proteins, specifically *Slc45a3* and *Slc38a5*, are also downregulated in acute  
379 dehydration. These genes are part of a large family essential for transferring solutes across membranes  
380 (reviewed in Hediger et al., 2004; Hediger et al., 2013; Cesar-Razquin et al., 2015). Another member of  
381 this family, Solute carrier family 2 member 9 (*Slc2a9*), has been found to be undergoing positive selection  
382 in studies on kidney transcriptomes of cactus mouse (MacManes & Eisen, 2014) and of other desert  
383 rodents (Marra, Romero & DeWoody, 2014). Our previous work with the male reproductive transcriptome  
384 of cactus mouse found evidence for positive selection in two additional solute carrier proteins: *Slc15a3*  
385 and *Slc47a1* (Kordonowy and MacManes, 2016). Therefore, our current findings that two solute carrier

386 proteins are lower expressed in the DRY treatment group is consistent with previous research in the kidney  
387 and male reproductive transcriptomes for this species. This leads us to further support the hypothesis  
388 originally proposed by Marra, Romero & DeWoody (2014) that this protein family is intrinsic to  
389 osmoregulation in desert rodents. Indeed, the findings of MacManes and Eisen (2014) and Kordonowy  
390 and MacManes (2016) also lend support to the essential role of solute carrier proteins for maintaining  
391 homeostasis in the desert specialized cactus mouse.

392 In addition to their well characterized role in the maintenance of water and electrolyte balance, the  
393 differential expression of solute carrier proteins may have important reproductive consequences,  
394 particularly as they relate to hormone secretion. Indeed, the interaction between Slc38a5 and Adam7 is  
395 relevant, because Adam7 is involved in sperm maturation and the acrosome reaction (Oh et al., 2005).  
396 Furthermore, the protein-protein interactions between Slc45a3 with STaR and between Insl3 and Lep are  
397 of particular interest because both STaR and Lep are integral to reproduction, as well as to homeostasis  
398 (reviewed in Christenson and Strauss III, 2001; Anuka et al., 2013; Friedman, 2014; Allison and Myers,  
399 2014). Thus, the protein interactions with reproductive implications are not restricted to solute carrier  
400 proteins. The protein relationships between Itgal and intercellular adhesion molecules are also noteworthy  
401 with respect to research hypothesizing an integral role for ICAMs in spermatogenesis (Xiao, Mruk and  
402 Cheng, 2013). Furthermore, Trf is linked to Apoa1, which is a critical component of sperm activating  
403 protein (Akerlof et al., 1991; Leijonhufvud, Akerlof and Pousette, 1997). While the relationship between  
404 these differentially expressed genes and the hormones involved in reproductive function are currently  
405 poorly-characterized, our findings that genes integral to sperm development and activation interact with  
406 genes differentially expressed in acute dehydration provide strong evidence that, contrary to our  
407 expectations, acute dehydration is linked to reproductive suppression in the cactus mouse.

408 In contrast to genes that are down-regulated in dehydration, the genes that were upregulated in the  
409 DRY group are known to be responsible for water homeostasis and cellular growth. The significance of  
410 Rin2 is notable, because this protein is an effector for Rab5, which as a GTPase involved in vasopressin-  
411 regulated water reabsorption, a critical homeostatic process mediated through the AQP2 water channel in  
412 kidneys (Boone and Deen, 2008; Kwon et al., 2013). It is not surprising that genes in addition to solute  
413 carrier proteins, which are implicated in alternative processes for water homeostasis, are differentially  
414 expressed in response to water limitation. The other two genes that are up-regulated in the DRY treatment  
415 are indicative of modulated growth due to water limitation. Specifically, Igfb3 interacts directly with

416 insulin growth factors responsible for tissue growth (le Roth 1997; Jones and Clemmons, 2008), and Ctgf  
417 is linked with numerous transcription factors in the Hippo signaling pathway, which modulates apoptosis,  
418 proliferation and organ size control (Pan, 2010).

419 Emerging from this work is a hypothesis related to the reproductive response to water stress in the  
420 cactus mouse, and perhaps other desert animals. Specifically, we hypothesize that while acute dehydration  
421 is related to reproductive suppression, chronic dehydration is not. Indeed, it is virtually oxymoronic to  
422 suggest that chronic dehydration, which is the baseline condition in desert animals, has negative  
423 consequences for reproductive success. Generating an integrative, systems-level understanding of the  
424 response to dehydration is required for testing this hypothesis. While understanding the renal response to  
425 dehydration is critical for making predictions about survival, understanding the reproductive correlates is  
426 perhaps even more relevant to evolutionary fitness. Though decades of research have characterized the  
427 former, this study, to the best of our knowledge, is the first to describe the reproductive correlates of water-  
428 limitation. Developing this understanding, particularly in light of global climate change, where increasing  
429 climate variability is predicted, is necessary if we are to understand how climate change may modify the  
430 distribution of extant organisms.

431

## 432 **Conclusion**

433 The genetic mechanisms responsible for physiological adaptations for survival and reproduction  
434 in deserts remain enigmatic. Previous research has focused exclusively on adaptations related to survival,  
435 specifically on renal adaptations to combat extreme water-limitation. In contrast, no research related to  
436 the reproductive effects of acute and chronic dehydration on desert-adapted rodents has been previously  
437 conducted. To this end, we characterized the reproductive correlates of acute dehydration in a desert-  
438 specialized rodent, the cactus mouse, using a highly replicated RNAseq experiment. In contrast to  
439 expectations, we describe a signal of reproduction suppression in dehydrated male mice. Specifically,  
440 dehydrated mice demonstrated significantly lower expression of *Insl3*, which is a regulator of fertility, as  
441 well as *Slc45a3* and *Slc38a5*, both of which have interactions with genes important to reproductive  
442 function. While the low number of differentially expressed genes between acutely dehydrated and control  
443 mice might otherwise have suggested that this species is relatively unaffected by acute water-limitation,  
444 the diminished expression of these genes, particularly *Insl3*, in dehydrated mice indicates the potential for  
445 compromised fertility. Although an experimental demonstration of a functional relationship between this



446 gene expression pattern and reduced fertility is still needed, our finding that acute-dehydration alters the  
447 expression of genes critical to reproductive function is concerning, particularly with respect to global  
448 climate change. Climate change driven increased variabilities in weather patterns may result in a greater  
449 frequency of acute water-stress, which could result in reduced reproductive function for the cactus mouse.  
450 In addition, because global climate change is predicted to shift habitats toward extremes in temperature,  
451 salinity, and aridity, and to alter species ranges, an enhanced understanding of the reproductive  
452 consequences of these changes, and of the potential for organisms to rapidly adapt, may enable us to  
453 effectively conserve innumerable species facing dramatic habitat changes.

454

455 Table 1: Transcriptome assembly performance metrics: contig number (n), TransRate score (Score),  
 456 BUSCO indices: % single copy orthologs (% SCO), % duplicated copy orthologs (% DCO), %  
 457 fragmented (% frag), and % missing (% miss), as well as Salmon mapping rates (% map) for the  
 458 optimized testes assembly.

459

| <b>Assembly Description</b>                 | <b>n</b> | <b>Score</b> | <b>% SCO</b> | <b>% DCO</b> | <b>% frag</b> | <b>% miss</b> | <b>% map</b> |
|---------------------------------------------|----------|--------------|--------------|--------------|---------------|---------------|--------------|
| BinPacker CD-hit-est<br>TransRate Corrected | 155134   | 0.335        | 77           | 27           | 5.9           | 16            | 92.14        |

460

461

462 Table 2: Dammit transcriptome assembly annotation statistics. Dammit annotation includes searches in  
 463 the program TransDecoder for open reading frames (ORFs) and searches for homologous sequences in  
 464 five databases: Rfam, Pfam-A, Uniref90, OrthoDB, and BUSCO. Percentages were calculated from the  
 465 count number of each parameter divided by the total number of contigs in the transcriptome (155,134).  
 466 The only exception to this calculation is for complete ORFs, which were calculated as a percentage of  
 467 the total ORFs (75,482). The BUSCO results for the annotated assembly are not shown here as they are  
 468 identical to those for the un-annotated assembly (Table 2).

469

| <b>Search Type</b> | <b><i>TransDecoder</i></b> |                  | <b><i>Rfam</i></b> | <b><i>Pfam-A</i></b> | <b><i>Uniref90</i></b> | <b><i>OrthoDB</i></b> | <b><i>Dammit</i></b>       |
|--------------------|----------------------------|------------------|--------------------|----------------------|------------------------|-----------------------|----------------------------|
| <b>Parameter</b>   | Total<br>ORFs              | Complete<br>ORFs | ncRNAs             | Protein<br>Domains   | Proteins               | Orthologs             | Total Annotated<br>Contigs |
| <b>Count</b>       | 75,482                     | 43,028           | 937                | 25,675               | 62,865                 | 51,806                | 77,915                     |
| <b>Percentage</b>  | 48.7%                      | 57.0 %           | 0.6 %              | 16.6 %               | 40.5 %                 | 33.4 %                | 50.2 %                     |

470

471

472 Table 3: EdgeR determined significantly differentially expressed genes by treatment group in *P.*  
473 *eremicus* testes. Of the 15 DGE, seven were significantly more highly expressed in WET mice (High in  
474 WET) and eight were more highly expressed in DRY mice (High in DRY).

475

| Ensembl ID            | log <sub>2</sub> FC | logCPM | FDR      | Gene ID  | HIGH |
|-----------------------|---------------------|--------|----------|----------|------|
| ENSMUSG00000079019.2  | -4.354              | 1.650  | 5.82E-09 | Insl3    | WET  |
| ENSMUSG00000054200.6  | -3.734              | 0.619  | 1.82E-06 | Ffar4    | WET  |
| ENSMUSG00000026435.15 | -2.448              | 2.447  | 1.13E-03 | Slc45a3  | WET  |
| ENSMUSG00000025020.11 | -2.231              | 1.770  | 1.13E-03 | Slit1    | WET  |
| ENSMUSG00000031170.14 | -2.421              | 2.578  | 1.13E-03 | Slc38a5  | WET  |
| ENSMUSG00000030830.18 | -2.180              | 1.666  | 3.37E-02 | Itgal    | WET  |
| ENSMUSG00000032554.15 | -2.066              | 3.287  | 4.85E-02 | Trf      | WET  |
| ENSMUSG00000001768.15 | 3.086               | 1.006  | 1.46E-07 | Rin2     | DRY  |
| ENSMUSG00000025479.9  | 2.971               | 3.001  | 7.97E-05 | Cyp2e1   | DRY  |
| ENSMUSG00000020427.11 | 2.681               | 3.887  | 1.13E-03 | Igfbp3   | DRY  |
| ENSMUSG00000019997.11 | 2.314               | 3.235  | 1.13E-03 | Ctgf     | DRY  |
| ENSMUSG00000040170.13 | 1.951               | 0.753  | 1.72E-03 | Fmo2     | DRY  |
| ENSMUSG00000023915.4  | 1.534               | 1.290  | 2.02E-02 | Tnfrsf21 | DRY  |
| ENSMUSG00000052974.8  | 2.077               | 0.647  | 2.26E-02 | Cyp2f2   | DRY  |
| ENSMUSG00000027901.12 | 2.492               | -0.620 | 4.78E-02 | Dennd2d  | DRY  |

476

477 Table 4: EdgeR determined significantly differentially expressed transcripts by treatment group in *P.*  
 478 *eremicus* testes. Of the 66 total DTE, 45 were significantly more highly expressed in WET mice (High  
 479 in WET) and 21 were more highly expressed in DRY mice (High in DRY). BLASTn matches to  
 480 Ensembl IDs and corresponding Gene IDs.  
 481

| HIGH: WET         |                     |        |          |                       |         |
|-------------------|---------------------|--------|----------|-----------------------|---------|
| Transcript ID     | log <sub>2</sub> FC | logCPM | FDR      | Ensembl ID            | Gene    |
| BINPACKER.15365.1 | -3.703              | 0.047  | 5.31E-11 | ENSMUSG00000054200.6  | Ffar4   |
| BINPACKER.2960.1  | -4.268              | 1.147  | 2.06E-09 | ENSMUSG00000079019.2  | Insl3   |
| BINPACKER.17981.2 | -2.975              | 0.436  | 6.29E-08 | ENSMUSG00000026435.15 | Slc45a3 |
| BINPACKER.9961.2  | -2.426              | 1.998  | 7.50E-07 | ENSMUSG00000031170.14 | Slc38a5 |
| BINPACKER.3452.1  | -2.507              | -0.140 | 3.56E-06 | no match              | -       |
| BINPACKER.724.4   | -2.162              | 2.667  | 8.32E-06 | ENSMUSG00000032554.15 | Trf     |
| BINPACKER.9604.1  | -2.582              | 0.547  | 7.87E-05 | no match              | -       |
| BINPACKER.31087.1 | -2.908              | -0.858 | 9.74E-05 | no match              | -       |
| BINPACKER.24398.1 | -2.440              | -0.689 | 9.74E-05 | ENSMUSG00000036596.6  | Cpz     |
| BINPACKER.9726.1  | -3.474              | -0.107 | 2.38E-04 | ENSMUSG00000026435.15 | Slc45a3 |
| BINPACKER.9218.3  | -1.578              | 1.525  | 2.76E-04 | ENSMUSG00000021253.6  | Tgfb3   |
| BINPACKER.18534.1 | -2.332              | 1.346  | 4.85E-04 | ENSMUSG00000025020.11 | Slit1   |
| BINPACKER.17022.3 | -2.899              | -0.561 | 1.00E-03 | no match              | -       |
| BINPACKER.13806.1 | -2.442              | -0.381 | 1.13E-03 | ENSMUSG00000025172.2  | Ankrd2  |
| BINPACKER.7740.1  | -2.790              | 1.095  | 1.13E-03 | ENSMUSG00000057074.6  | Ces1g   |
| BINPACKER.10034.2 | -4.420              | 0.387  | 1.23E-03 | ENSMUSG00000026516.8  | Nvl     |
| BINPACKER.11560.2 | -1.465              | 2.050  | 1.66E-03 | ENSMUSG00000021913.7  | Ogdhl   |
| BINPACKER.13701.1 | -1.312              | 1.804  | 2.28E-03 | ENSMUSG00000025648.17 | Pfkfb4  |
| BINPACKER.3510.3  | -2.163              | 0.906  | 2.95E-03 | ENSMUSG00000027822.16 | Slc33a1 |
| BINPACKER.15806.1 | -1.700              | 1.062  | 3.39E-03 | ENSMUSG00000015702.13 | Anxa9   |
| BINPACKER.17992.1 | -2.542              | 0.653  | 3.39E-03 | ENSMUSG00000030830.18 | Itgal   |
| BINPACKER.9726.2  | -2.119              | 0.560  | 3.48E-03 | ENSMUSG00000026435.15 | Slc45a3 |
| BINPACKER.6383.3  | -2.093              | 1.270  | 4.16E-03 | ENSMUSG00000002109.14 | Ddb2    |

|                      |                          |               |            |                       |             |
|----------------------|--------------------------|---------------|------------|-----------------------|-------------|
| BINPACKER.20716.2    | -4.204                   | -0.566        | 5.75E-03   | ENSMUSG00000013846.9  | St3gal1     |
| BINPACKER.20114.1    | -1.661                   | 0.501         | 5.97E-03   | ENSMUSG00000030972.6  | Acsn5       |
| BINPACKER.18622.1    | -1.645                   | 1.704         | 6.36E-03   | no match              | -           |
| BINPACKER.24914.1    | -2.211                   | -0.159        | 9.83E-03   | ENSMUSG00000003555.7  | Cyp17a1     |
| BINPACKER.31815.1    | -1.905                   | -0.770        | 9.83E-03   | no match              | -           |
| BINPACKER.6740.3     | -3.090                   | -0.434        | 1.04E-02   | no match              | -           |
| BINPACKER.20530.1    | -1.626                   | 0.545         | 1.12E-02   | ENSMUSG00000038463.8  | Olfml2b     |
| BINPACKER.20656.1    | -1.910                   | -0.531        | 1.22E-02   | ENSMUSG00000029373.7  | Pf4         |
| BINPACKER.4855.1     | -1.340                   | 4.025         | 1.23E-02   | ENSMUSG00000059991.7  | Nptx2       |
| BINPACKER.1846.1     | -3.280                   | -0.792        | 1.23E-02   | no match              | -           |
| BINPACKER.6494.2     | -3.363                   | 0.029         | 1.26E-02   | ENSMUSG00000052861.13 | Dnah6       |
| BINPACKER.1818.1     | -1.713                   | 3.289         | 2.03E-02   | ENSMUSG00000024125.1  | Sbpl        |
| BINPACKER.10743.2    | -1.915                   | -0.525        | 2.06E-02   | ENSMUSG00000041607.16 | Mbp         |
| BINPACKER.13054.2    | -1.147                   | 2.697         | 2.06E-02   | ENSMUSG00000022994.8  | Adcy6       |
| BINPACKER.6807.1     | -1.330                   | 2.106         | 2.13E-02   | ENSMUSG00000046687.5  | Gm5424      |
| BINPACKER.14160.1    | -2.051                   | 0.603         | 2.86E-02   | ENSMUSG00000041556.8  | Fbxo2       |
| BINPACKER.16191.1    | -1.431                   | 0.926         | 3.42E-02   | ENSMUSG00000028654.13 | Mycl        |
| BINPACKER.10141.3    | -3.283                   | -1.191        | 3.68E-02   | ENSMUSG00000024132.5  | Eci1        |
| BINPACKER.23790.1    | -1.756                   | -0.275        | 4.51E-02   | ENSMUSG00000001119.7  | Col6a1      |
| BINPACKER.22521.1    | -1.841                   | -0.056        | 4.52E-02   | ENSMUSG00000054083.8  | Capn12      |
| BINPACKER.1061.6     | -1.807                   | 1.943         | 4.93E-02   | no match              | -           |
| BINPACKER.17734.1    | -1.660                   | 2.109         | 4.94E-02   | ENSMUSG00000049608.8  | Gpr55       |
| <b>HIGH: DRY</b>     |                          |               |            |                       |             |
| <b>Transcript ID</b> | <b>log<sub>2</sub>FC</b> | <b>logCPM</b> | <b>FDR</b> | <b>Ensembl ID</b>     | <b>Gene</b> |
| BINPACKER.21794.1    | 2.434                    | 3.117         | 4.41E-08   | ENSMUSG00000020427.11 | Igfbp3      |
| BINPACKER.28731.1    | 2.484                    | 1.634         | 4.41E-08   | no match              | -           |
| BINPACKER.5662.4     | 2.061                    | 2.419         | 1.32E-07   | ENSMUSG00000019997.11 | Ctgf        |
| BINPACKER.87639.1    | 2.682                    | 0.345         | 1.96E-07   | ENSMUSG00000001768.15 | Rin2        |
| BINPACKER.35470.1    | 2.367                    | 1.786         | 1.89E-04   | no match              | -           |
| BINPACKER.52106.1    | 2.096                    | -0.542        | 6.83E-04   | no match              | -           |

|                    |       |        |          |                       |         |
|--------------------|-------|--------|----------|-----------------------|---------|
| BINPACKER.3957.3   | 6.309 | 1.579  | 1.02E-03 | ENSMUSG00000019988.6  | Nedd1   |
| BINPACKER.116235.1 | 2.212 | 0.301  | 3.94E-03 | no match              | -       |
| BINPACKER.4449.4   | 3.428 | -0.538 | 6.74E-03 | ENSMUSG00000005150.16 | Wdr83   |
| BINPACKER.28.2     | 4.183 | 2.295  | 1.05E-02 | ENSMUSG00000075706.10 | Gpx4    |
| BINPACKER.56553.1  | 1.472 | 0.172  | 1.46E-02 | no match              | -       |
| BINPACKER.93518.1  | 1.711 | -0.793 | 1.57E-02 | no match              | -       |
| BINPACKER.11512.1  | 1.187 | 3.654  | 1.70E-02 | ENSMUSG00000031591.14 | Asah1   |
| BINPACKER.66588.1  | 1.851 | -0.347 | 1.71E-02 | no match              | -       |
| BINPACKER.42718.1  | 1.542 | 0.507  | 2.06E-02 | ENSMUSG00000030790.15 | Adm     |
| BINPACKER.49203.1  | 1.639 | -0.035 | 2.44E-02 | no match              | -       |
| BINPACKER.147548.1 | 1.744 | -0.007 | 2.99E-02 | ENSMUSG00000042757.15 | Tmem108 |
| BINPACKER.23756.2  | 1.265 | 3.468  | 3.01E-02 | ENSMUSG00000022061.8  | Nkx3-1  |
| BINPACKER.12709.1  | 3.906 | 2.611  | 3.01E-02 | ENSMUSG00000028639.14 | Ybx1    |
| BINPACKER.5280.2   | 3.874 | 0.257  | 3.76E-02 | ENSMUSG00000074582.10 | Arfgef2 |
| BINPACKER.58702.1  | 1.780 | -0.500 | 4.93E-02 | no match              | -       |

482

483

484

485 Table 5: DESeq2 determined significantly differentially expressed genes by treatment group in *P.*  
 486 *eremicus* testes. Of the 20 DGE with a  $-1 < \log_2 \text{fold change} > 1$ , 16 were significantly more highly  
 487 expressed in WET mice (High in WET) and four were more highly expressed in DRY mice (High in  
 488 DRY).

| Ensembl ID            | baseMean   | log <sub>2</sub> FC | p-adjusted | Gene ID | HIGH |
|-----------------------|------------|---------------------|------------|---------|------|
| ENSMUSG00000054200.6  | 8.77721485 | -2.2659204          | 1.24E-27   | Ffar4   | WET  |
| ENSMUSG00000026435.15 | 38.7630267 | -2.2184407          | 1.16E-42   | Slc45a3 | WET  |
| ENSMUSG00000079019.2  | 24.7158409 | -1.6454793          | 4.55E-13   | Insl3   | WET  |
| ENSMUSG00000031170.14 | 42.2322119 | -1.6434261          | 6.64E-15   | Slc38a5 | WET  |
| ENSMUSG00000038463.8  | 16.2605998 | -1.4619721          | 3.55E-12   | Olfml2b | WET  |
| ENSMUSG00000030830.18 | 22.0478661 | -1.4358002          | 3.41E-10   | Itgal   | WET  |
| ENSMUSG00000032554.15 | 67.5197473 | -1.3762549          | 7.26E-10   | Trf     | WET  |
| ENSMUSG00000021253.6  | 31.2493344 | -1.3551661          | 7.02E-14   | Tgfb3   | WET  |
| ENSMUSG00000030972.6  | 13.8934534 | -1.1709964          | 2.37E-07   | Acsm5   | WET  |
| ENSMUSG00000059991.7  | 173.025492 | -1.1528314          | 5.12E-11   | Nptx2   | WET  |
| ENSMUSG00000046687.5  | 44.9527785 | -1.0989949          | 8.31E-09   | Gm5424  | WET  |
| ENSMUSG00000024125.1  | 101.5876   | -1.0962074          | 9.77E-06   | Sbpl    | WET  |
| ENSMUSG00000021913.7  | 46.5401886 | -1.0876018          | 8.70E-07   | Ogdhl   | WET  |
| ENSMUSG00000015702.13 | 27.7002506 | -1.0603879          | 1.95E-05   | Anxa9   | WET  |
| ENSMUSG00000036596.6  | 6.6698922  | -1.0243046          | 9.04E-05   | Cpz     | WET  |
| ENSMUSG00000025172.2  | 13.2622565 | -1.0138171          | 0.00013318 | Ankrd2  | WET  |
| ENSMUSG00000042757.15 | 14.5676529 | 1.00643936          | 0.00019556 | Tmem108 | DRY  |
| ENSMUSG00000019997.11 | 64.49614   | 1.03331405          | 7.67E-05   | Ctgf    | DRY  |
| ENSMUSG00000020427.11 | 92.3763518 | 1.56656207          | 4.55E-13   | Igfbp3  | DRY  |
| ENSMUSG00000001768.15 | 12.3794312 | 1.72433255          | 8.16E-16   | Rin2    | DRY  |

489

490

491 Table 6: Functional information and chromosome (CHR) locations (*Mus musculus*) for the nine genes  
492 differentially expressed across all three analyses in *P. eremicus* testes by treatment group

| Gene Name                                    | Gene ID | Gene Function                                  | CHR | HIGH |
|----------------------------------------------|---------|------------------------------------------------|-----|------|
| Insulin-like 3                               | Insl3   | testicular function and testicular development | 8   | WET  |
| Free-fatty acid receptor 4                   | Ffar4   | metabolism and inflammation                    | 19  | WET  |
| Solute carrier family 45 member 3            | Slc45a3 | sugar transport                                | 1   | WET  |
| Solute carrier family 48 member 5            | Slc38a5 | sodium-dependent amino acid transport          | X   | WET  |
| Integrin alpha L                             | Itgal   | lymphocyte-mediated immune responses           | 7   | WET  |
| Transferrin                                  | Trf     | iron transport and delivery to erythrocytes    | 9   | WET  |
| Ras and Rab Interactor 2                     | Rin2    | endocytosis and membrane trafficking           | 2   | DRY  |
| Insulin-like growth factor binding protein 3 | Igfbp3  | modulates effects of insulin growth factors    | 11  | DRY  |
| Connective tissue growth factor              | Ctgf    | fibrosis and extracellular matrix formation    | 10  | DRY  |

493

494



495 Figure 1: Plot of edgeR determined differentially expressed genes. The 15 significant genes are in red,  
496 with positive values indicating increased expression in the DRY group, and negative values depicting  
497 increased expression in the WET group.

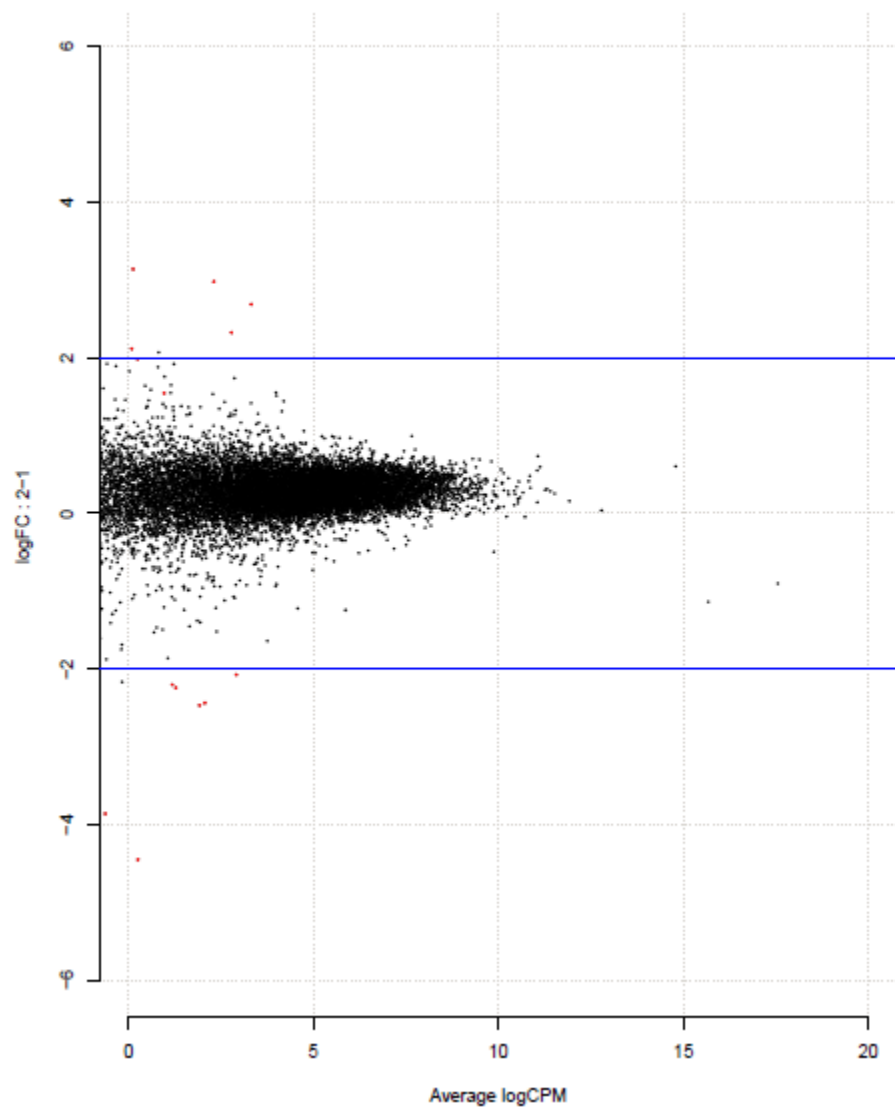

498  
499  
500  
501  
502  
503  
504

505 Figure 2: Plot of edgeR determined differentially expressed transcripts. The 66 significant transcripts are  
506 in red, with positive values indicating increased expression in the DRY group, and negative values  
507 depicting increased expression in the WET group.

508

509

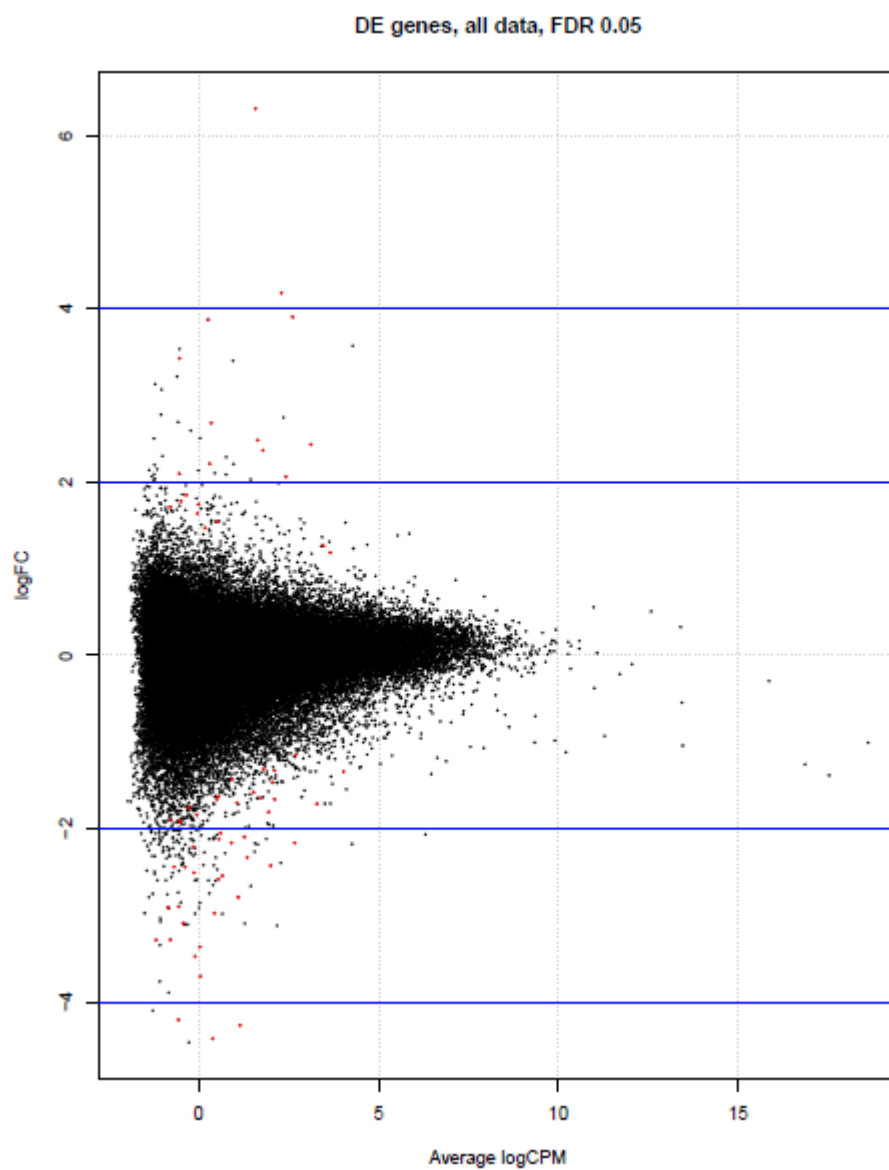

510

511

512 Figure 3: Plot of DESeq2 determined differentially expressed transcripts. The 215 significant transcripts  
513 are in red, with positive values indicating increased expression in the DRY group, and negative values  
514 depicting increased expression in the WET group.  
515

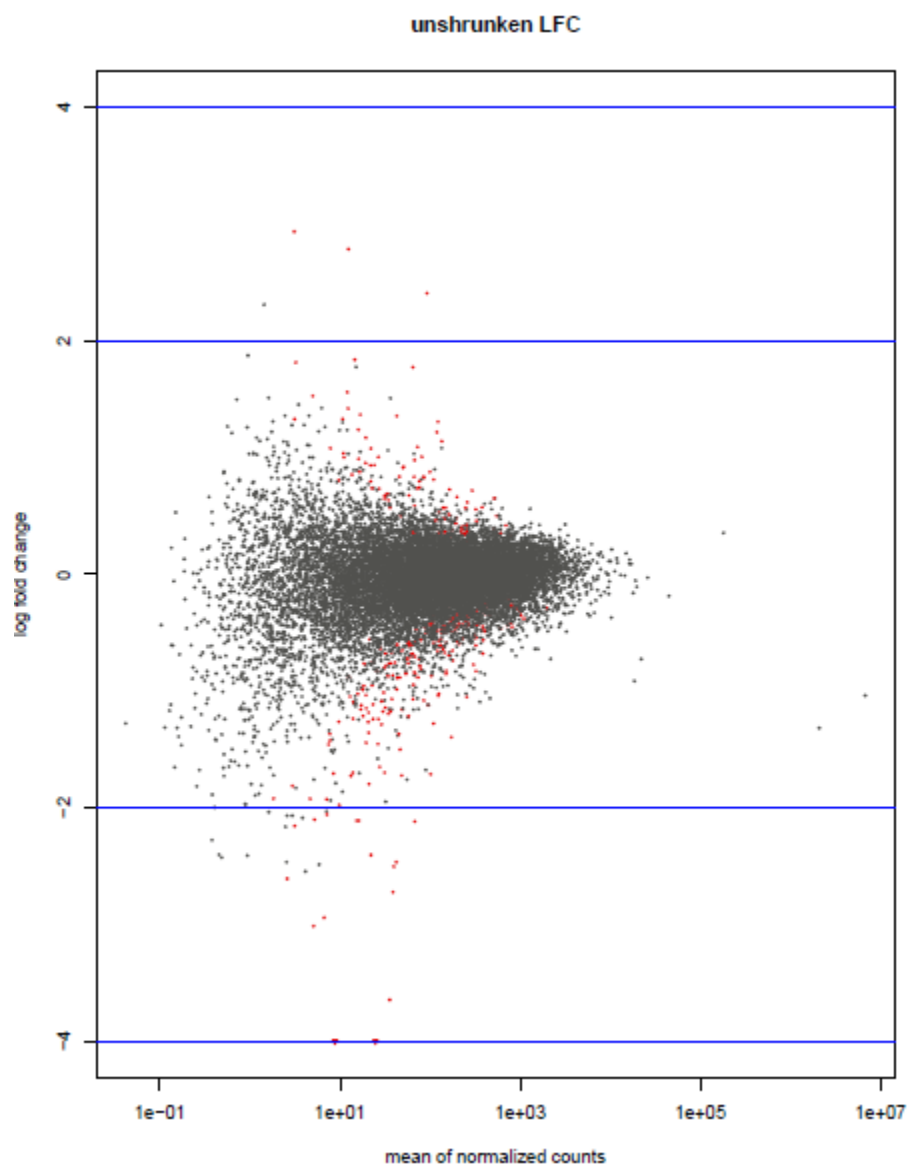

516  
517  
518  
519  
520

521 Figure 4: Correlation of  $\log_2$  fold change results for all Ensembl ID gene matches from DESeq2 and  
522 edgeR DGE analyses ( $\text{Adj-R}^2 = 0.6596$ ;  $F(1,14214) = 2.754 \times 10^4$ ;  $p < 2.2 \times 10^{-16}$ ).

523

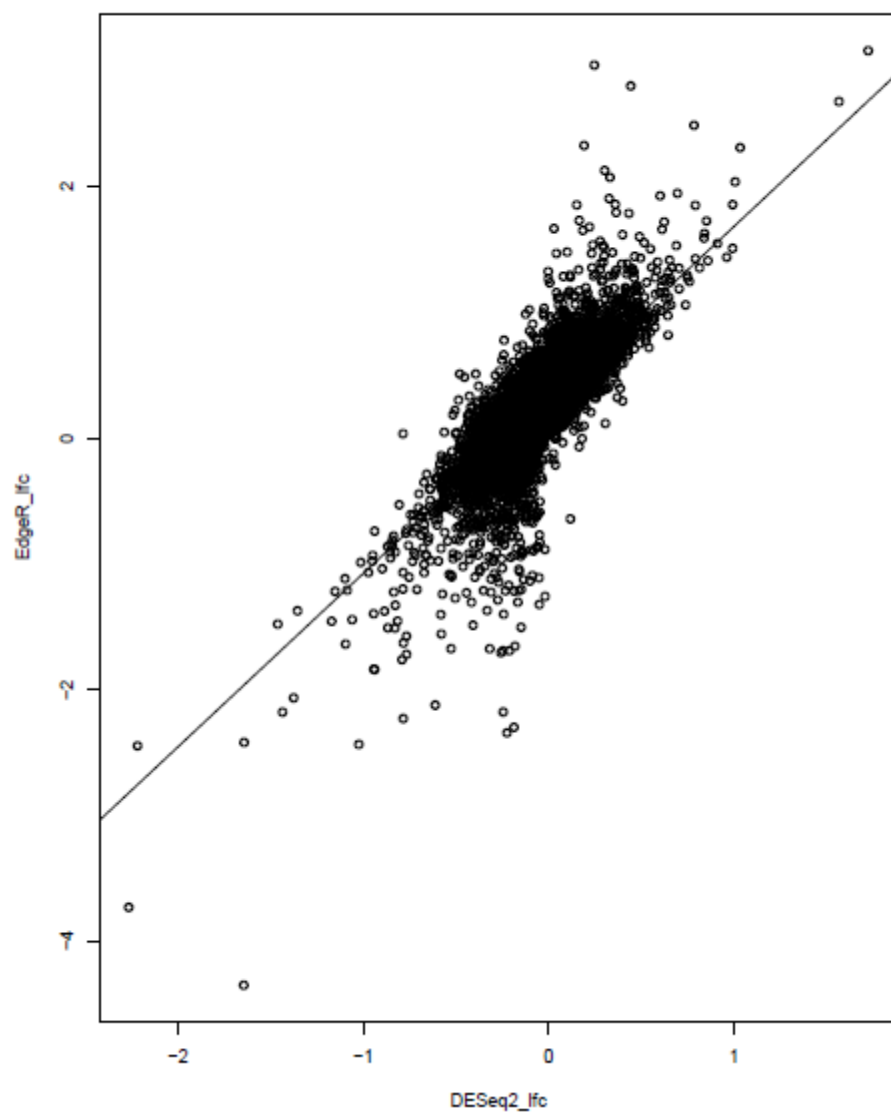

524

525

526

527

528

529

530 Figure 5: Box plots of edgeR analyzed differences in gene expression by treatment for the nine genes  
531 significantly differentially expressed in all three analyses. Counts per million (cpms) for both treatments  
532 (WET and DRY) are indicated.

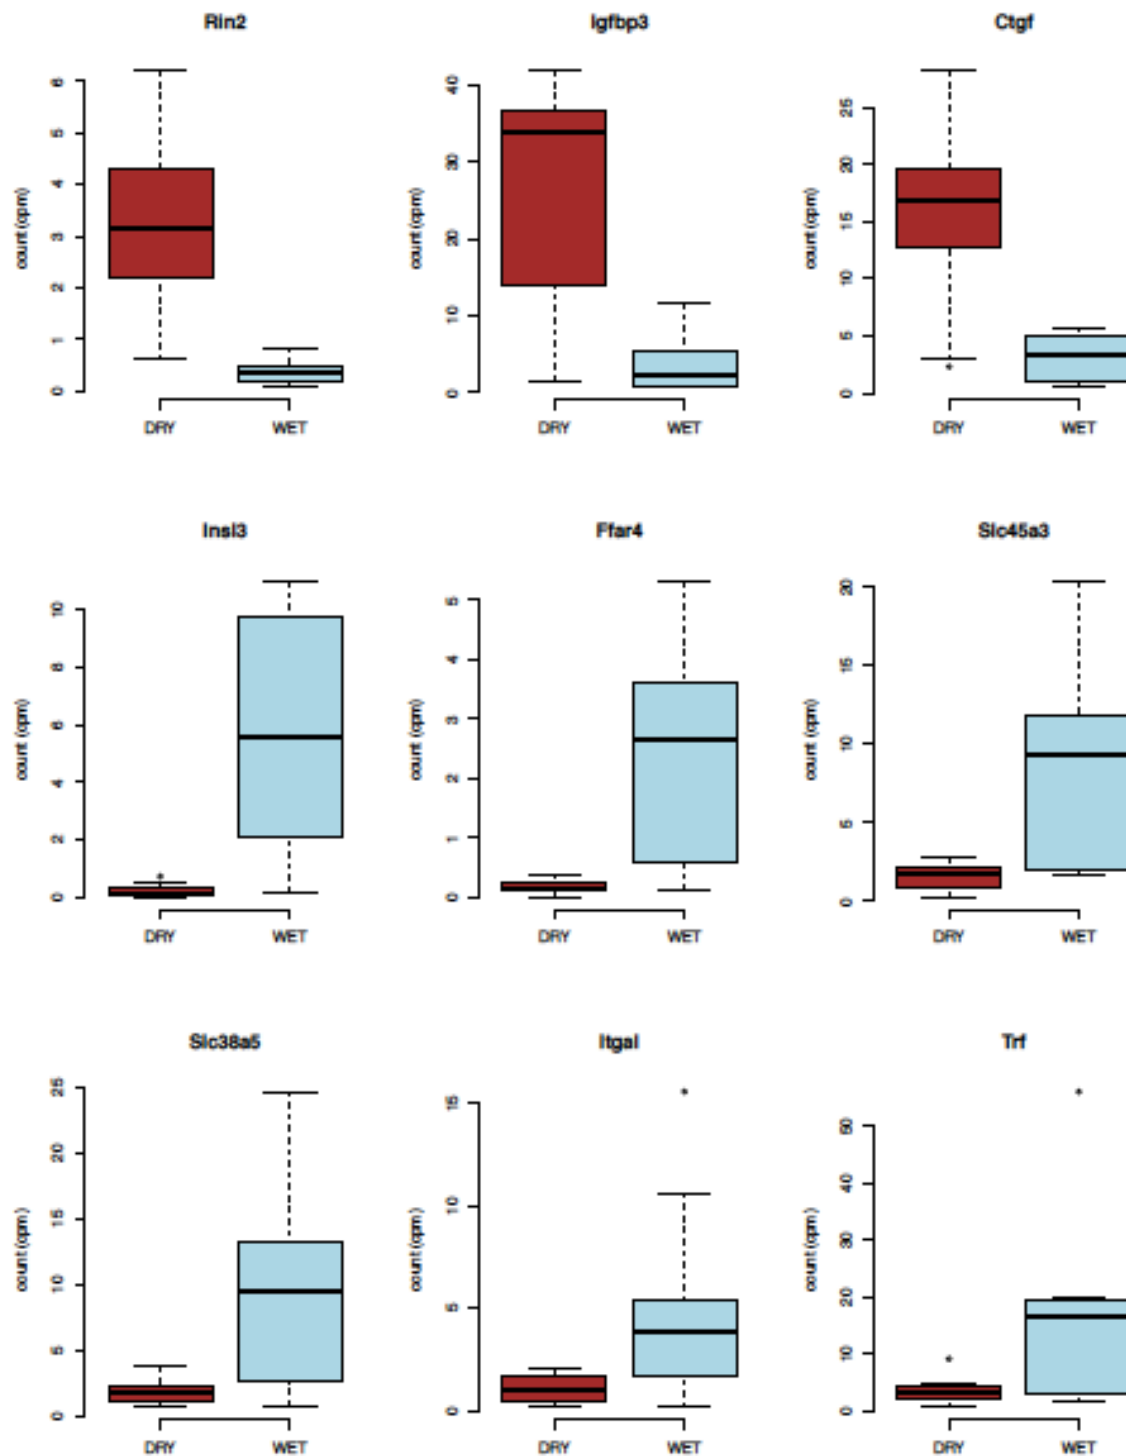

533

534 Figure 6: STRING diagrams of protein-protein interactions for genes significantly differentially  
535 expressed (highly expressed) in the WET treatment group. These six genes are (a) Slc38a5, (b) Slc45a3,  
536 (c) Insl3, (d) Ffar4 (also known as O3far1), (e) Itgal, and (f) Trf.

537

538 (a)

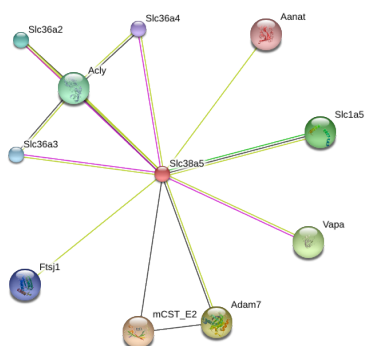

539

540 (b)

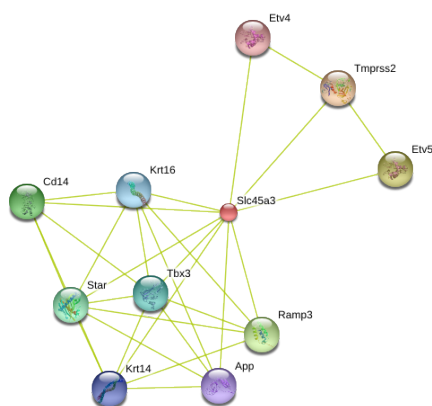

541

542 (c)

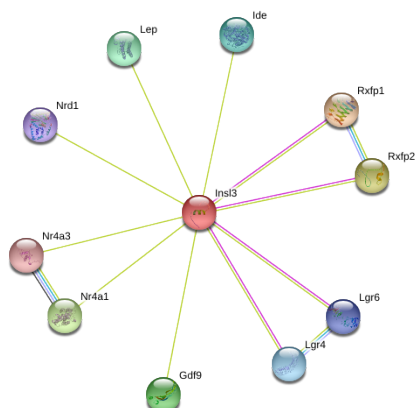

543

544 (d)

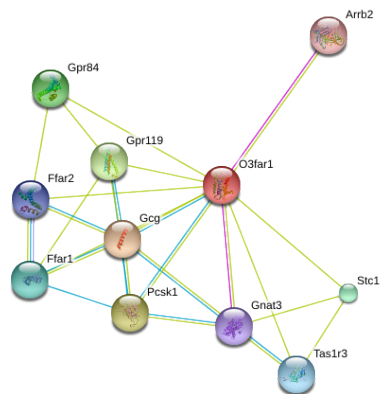

545

546 (e)

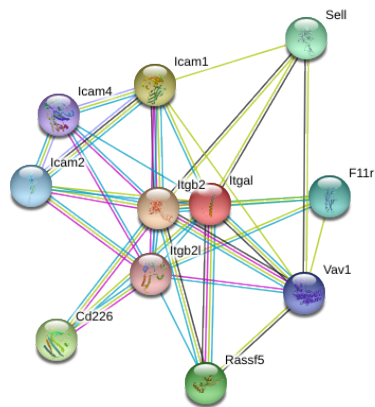

547

548 (f)

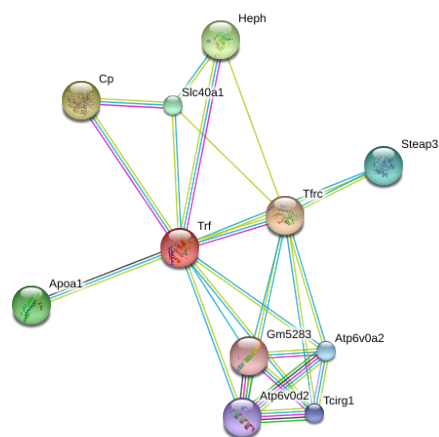

549

550 Figure 7: STRING diagrams of protein-protein interactions for genes significantly differentially  
551 expressed (highly expressed) in the DRY treatment group. These three genes are (a) Rin2, (b) Igfbp3,  
552 and (c) Ctgf.

553 (a)

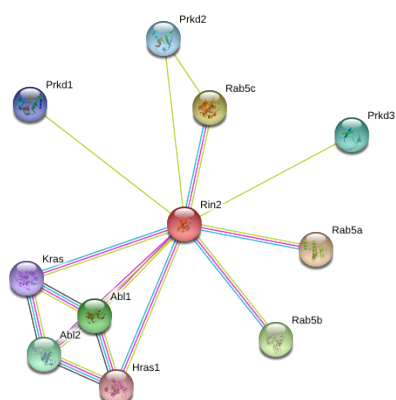

554

555 (b)

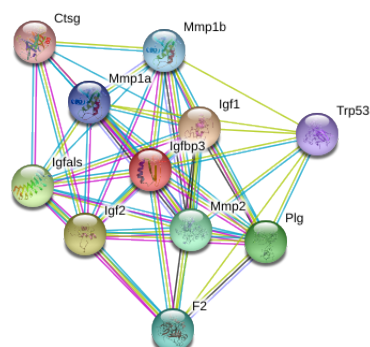

556

557

558 (c)

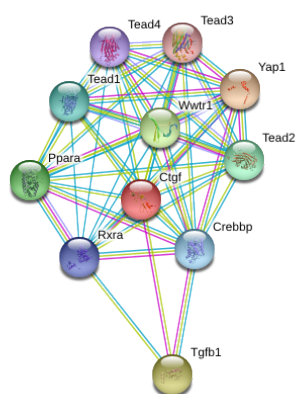

559



560 Supplemental 1: Testes read data statistics, including sample identification (Mouse ID), number of reads  
561 (# Reads), percent reads mapped to transcriptome (% Mapping), and treatment group (TRT). Mouse ID  
562 335T\* is the dataset which was used to assemble the testes transcriptome; therefore, these reads were  
563 not used for the differential expression analysis.

| Mouse ID     | # Reads         | % Mapping    | TRT        |
|--------------|-----------------|--------------|------------|
| <b>335T*</b> | <b>45759114</b> | <b>85.46</b> | <b>wet</b> |
| 3333T        | 15135923        | 82.56        | Wet        |
| 2322T        | 12584407        | 82.37        | Dry        |
| 382T         | 14305186        | 83.87        | Dry        |
| 381T         | 14178847        | 83.23        | Wet        |
| 376T         | 14588175        | 82.56        | Dry        |
| 366T         | 13641731        | 82.95        | Wet        |
| 349T         | 17289781        | 85.93        | Wet        |
| 209T         | 11724617        | 84.02        | Dry        |
| 265T         | 11536510        | 84.17        | Dry        |
| 383T         | 13250034        | 81.46        | Dry        |
| 384T         | 12152820        | 82.75        | Dry        |
| 102T         | 11131941        | 84.84        | Wet        |
| 400T         | 13259393        | 83.98        | Wet        |
| 1357T        | 20603232        | 82.32        | Wet        |
| 1358T        | 12240814        | 86.58        | Wet        |
| 1359T        | 11144962        | 85.54        | Wet        |
| 13T          | 11075885        | 83.55        | Dry        |
| 343T         | 9423867         | 83.58        | Dry        |
| 344T         | 17146134        | 85.36        | Wet        |
| 355T         | 13948415        | 85.21        | Wet        |
| 888T         | 18890387        | 86.52        | Dry        |
| 999T         | 15213425        | 87.02        | Dry        |

564

565

566 Supplemental 2: Significantly differentially expressed genes identified in the three analyses (DGE in  
 567 edgeR, DTE in edgeR, and DGE in DESeq2) by treatment group in *P. eremicus* testes. Of the 34  
 568 different genes which were more highly expressed in WET mice, six were significant across all three  
 569 analyses (Gene IDs are italicized). Of the 17 genes which were more highly expressed in DRY mice,  
 570 three were significant across all three analyses (Gene IDs are italicized).

| <b>HIGH: WET</b> |                  |                  |                   |
|------------------|------------------|------------------|-------------------|
| <b>Gene ID</b>   | <b>DGE edgeR</b> | <b>DTE edgeR</b> | <b>DGE DESeq2</b> |
| <i>Insl3</i>     | x                | X                | x                 |
| <i>Ffar4</i>     | x                | X                | x                 |
| <i>Slc45a3</i>   | x                | X                | x                 |
| <i>Slc38a5</i>   | x                | X                | x                 |
| <i>Itgal</i>     | x                | X                | x                 |
| <i>Trf</i>       | x                | X                | x                 |
| Slit1            | x                | X                |                   |
| Cpz              |                  | X                | x                 |
| Tgfb3            |                  | X                | x                 |
| Ces1g            |                  | X                |                   |
| Ankrd2           |                  | X                | x                 |
| Nvl              |                  | X                |                   |
| Ogdhl            |                  | X                | x                 |
| Pfkfb4           |                  | X                |                   |
| Slc33a1          |                  | X                |                   |
| Anxa9            |                  | X                | x                 |
| Ddb2             |                  | X                |                   |
| St3gal1          |                  | X                |                   |
| Acsm5            |                  | X                | x                 |
| Cyp17a1          |                  | X                |                   |
| Olfml2b          |                  | X                | x                 |
| Pf4              |                  | X                |                   |
| Nptx2            |                  | X                | x                 |

|                  |                  |                  |                   |
|------------------|------------------|------------------|-------------------|
| Dnah6            |                  | X                |                   |
| Sbpl             |                  | X                | x                 |
| Adcy6            |                  | X                |                   |
| Gm5424           |                  | X                | x                 |
| Mbp              |                  | X                |                   |
| Fbxo2            |                  | X                |                   |
| Mycl             |                  | X                |                   |
| Eci1             |                  | X                |                   |
| Capn12           |                  | X                |                   |
| Col6a1           |                  | X                |                   |
| Gpr55            |                  | X                |                   |
| <b>HIGH: DRY</b> |                  |                  |                   |
| <b>Gene ID</b>   | <b>DGE edgeR</b> | <b>DTE edgeR</b> | <b>DGE DESeq2</b> |
| <i>Rin2</i>      | x                | X                | x                 |
| <i>Igfbp3</i>    | x                | X                | x                 |
| <i>Ctgf</i>      | x                | X                | x                 |
| Cyp2e1           | x                |                  |                   |
| Fmo2             | x                |                  |                   |
| Tnfrsf21         | x                |                  |                   |
| Cyp2f2           | x                |                  |                   |
| Dennd2d          | x                |                  |                   |
| Nedd1            |                  | X                |                   |
| Wdr83            |                  | X                |                   |
| Gpx4             |                  | X                |                   |
| Asah1            |                  | X                |                   |
| Adm              |                  | X                |                   |
| Tmem108          |                  | X                | x                 |
| Nkx3-1           |                  | X                |                   |
| Ybx1             |                  | X                |                   |
| Arfgef2          |                  | X                |                   |

- 571 **DropBox Files (will be submitted to Dryad upon acceptance):**
- 572       Optimized final un-annotated transcriptome (good.BINPACKER.cdhit.fasta)
- 573       Annotated transcriptome (good.BINPACKER.cdhit.fasta.dammit.fasta)
- 574       Dammit gff3 file of annotation (good.BINPACKER.cdhit.fasta.dammit.gff3)
- 575       Salmon folder including salmon quant outputs for 22 individuals (salmon)
- 576       Salmon merged quant file (NEWmergedcounts.txt)
- 577       Gene ID by Transcript ID matrix (NEWESTfinalMUS.txt)
- 578       Transcripts without matches from edgeR DTE analysis (DTEno-matchBLASTnSequences.md)

579 **Literature Cited:**

- 580
- 581 Ahmed A, Tiwari RJ, Mishra GK, Jena B, Dar MA, Bhat AA. 2015. Effect of environmental heat stress  
582 on reproductive performance of dairy cows- a review. International Journal of Livestock Research 5(4):  
583 10-18. doi: 10.5455/ijlr.20150421122704.
- 584 Akerlof E, Jornvall H, Slotte H, Pousette A. 1991. Identification of apolipoprotein A1 and  
585 immunoglobulin as components of a serum complex that mediates activation of human sperm motility.  
586 Biochemistry 30: 8986-8990. Doi:10.1021/bi00101a011.
- 587 Albelda SM, Smith CW, Ward PA. 1994. Adhesion molecules and inflammatory injury. The FASEB  
588 Journal 8(8): 504-512. *Doi N/A*
- 589 Allison MB, Myers MG Jr. 2014. 20 years of leptin: connecting leptin signaling to biological function.  
590 Journal of Endocrinology 223(1): T25-T35. Doi: 10.1530/JOE-14-0404.
- 591 Altschul SF, Gish W, Miller W, Myers EW, Lipman DJ. 1990. Basic local alignment search tool.  
592 Journal of Molecular Biology 215(3): 403-10. doi:10.1016/S0022-2836(05)80360-2.
- 593 Anuka E, Gal M, Stocco DM, Orly J. 2013. Expression and roles of steroidogenic acute regulatory  
594 (StAR) protein in 'non-classical', extra-adrenal and extra-gonadal cells and tissues. Molecular and  
595 Cellular Endocrinology 371(1-2):47-61. doi: 10.1016/j.mce.2013.02.003.
- 596 Asres A, Amha N. 2014. Physiological adaptation of animals to the change of environment: a review.  
597 Journal of Biology, Agriculture and Healthcare 4(25): 146-151.  
598 <http://www.iiste.org/Journals/index.php/JBAH/article/view/17387>
- 599 Bathgate RAD, Zhang S, Hughes RA, Rosengren KJ, Wade JD. 2012. The Structural Determinants of  
600 Insulin-Like Peptide 3 Activity. Frontiers in Endocrinology 3:11 (pp.1-10).  
601 doi:10.3389/fendo.2012.00011.
- 602 Bathgate RAD, Halls ML, van der Westhuizen ET, Callander GE, Kocan M, Summers RJ. 2013.  
603 Relaxin family peptides and their receptors. Physiological Reviews 93(1): 405-480. doi:  
604 10.1152/physrev.00001.2012

- 605 Bedford NL, Hoekstra HE. 2015. The Natural History of Model Organisms: *Peromyscus* mice as a  
606 model for studying natural variation. eLife 4: e06813. doi:10.7554/eLife.06813.
- 607 Benjamini Y, Hochberg Y. 1995. Controlling the false discovery rate: a practical and powerful approach  
608 to multiple testing. Journal of the Royal Statistical Society: Series B (Methodological) 57(1): 289-30.  
609 Stable URL: <http://www.jstor.org/stable/2346101>
- 610 Bolger DT, Patten MA, Bostock DC. 2005. Avian reproductive failure in response to an extreme  
611 climatic event. Oecologia 142(3):398-406. Doi: 10.1007/s0042-004-1734-9.
- 612 Boone M, Deen PMT. 2008. Physiology and pathophysiology of the vasopressin-regulated renal water  
613 reabsorption. Pflugers Archiv 456(6): 1005-1024. Doi: 10.1007/s00424-008-0498-1
- 614 Bose TO, Colpitts SL, Pham Q-M, Puddington L, Lefrancois L. 2014. CD11a is essential for normal  
615 development of hematopoietic intermediates. Journal of Immunology 193: 2863-2872. Doi:  
616 10.4049/jimmunol.1301820.
- 617 César-Razquin A, Snijder B, Frappier-Brinton T, Isserlin R, Gyimesi G, Bai X, Reithmeier RA,  
618 Hepworth D, Hediger MA, Edwards AM, Superti-Furga G. 2015. A call for systematic research on  
619 solute carriers. Cell 162 (3): 478-487. doi:10.1016/j.cell.2015.07.022.
- 620 Chang ACM, Cha J, Koentgen F, Reddel RR. 2005. The murine stanniocalcin 1 gene is not essential for  
621 growth and development. Molecular and Cellular Biology 25(3): 10604-10610. Doi:  
622 10.1128/MCB.25.23.10604-10610.2005.
- 623 Christenson LK, Strauss JF III. 2001. Steroidogenic acute regulatory protein: an update on its regulation  
624 and mechanism of action. Archives of Medical Research 32(6):576-586.  
625 [http://dx.doi.org/10.1016/S0188-4409\(01\)00338-1](http://dx.doi.org/10.1016/S0188-4409(01)00338-1)
- 626 Dantzer WH. 1982. Renal Adaptations of Desert Vertebrates. BioScience 32(2):108-113. Doi:  
627 10.2307/1308563
- 628 Dewey GC, Elias H, Appel KR. 1966. Stereology of renal corpuscles of desert and swamp deermice.  
629 Nephron 3(6): 352-365. Doi: 10.1159/000179552.

- 630 Diaz GB, Ojeda RA, Rezende EL. 2006. Renal morphology, phylogenetic history and desert adaptation  
631 of South American hystricognath rodents. *Functional Ecology* 20: 609–620. Doi: 10.1111/j.1365-  
632 2435.2006.01144.x
- 633 Doherty GJ, McMahon HT. 2009. Mechanisms of Endocytosis. *Annual Review of Biochemistry* 78:  
634 857-902. Doi: 10.1146/annurev.biochem.78.081307.110540
- 635 Evans MEK, Hearn DJ, Theiss KE, Cranston K, Holsinger KE, Donoghue MJ. 2010. Extreme  
636 environments select for reproductive assurance: evidence from evening primroses (*Oenothera*). *New*  
637 *Phytologist* 191:555-563. Doi: 10.1111/j.1469-8137.2011.03697.x.
- 638 Friedman J. 2014. 20 Years of leptin: leptin at 20: an overview. *Journal of Endocrinology* 223:1 T1-T8.  
639 Doi: 10.1530/JOE-14-0405.
- 640 Froussios K, Schurch NJ, Mackinnon K, Gierlinski M, Duc C, Simpson GG, Barton GJ. 2016. How well  
641 do RNA-Seq differential gene expression tools perform in higher eukaryotes? Doi: 10.1101/090753.
- 642 Fu L, Niu B, Zhu Z, Wu S, Li W. 2012. CD-HIT: accelerated for clustering the next generation sequencing  
643 data. *Bioinformatics* 28(23): 3150-3152. Doi: 10.1093/bioinformatics/bts565
- 644 Fuller A, Hetem RS, Maloney SK, Mitchell D. 2014. Adaptation to Heat and Water Shortage in Large, Arid-  
645 Zone Mammals. *Physiology* 29(3): 159-167. Doi: 10.1152/physiol.00049.2013
- 646 Geiser F. in *Aestivation: Molecular and Physiological Aspects* (Volume 49 in the series *Progress in*  
647 *Molecular and Subcellular Biology*, Springer, Berlin, 2010, Navas A, Carvalho C, Eduardo J.) 95-111.  
648 Doi:10.1007/978-3-642-02421-4\_5
- 649 Gierliński M, Cole C, Schofield P, Schurch NJ, Sherstnev A, Singh V, Wrobel N, Gharbi K, Simpson G,  
650 OwenHughes T, Blaxter M, Barton GJ. 2015. Statistical models for RNA-seq data derived from a two-  
651 condition 48-replicate experiment. *Bioinformatics* 31(22): 3625-3630. Doi:  
652 10.1093/bioinformatics/btv425.
- 653 Gkouvatsos K, Papanikolaou G, Pantopoulos K. 2012. Regulation of iron transport and the role of  
654 transferrin. *Biochimica Biophysica Acta (BBA) – General Subjects* 1820(3): 188-202.  
655 Doi:10.1016/j.bbagen.2011.10.013

- 656 Hediger MA, Romero MF, Peng J-B, Rolfs A, Takanaga H, Bruford EA. 2004. The ABCs of solute  
657 carriers: physiological, pathological and therapeutic implications of human membrane transport  
658 proteins: introduction. *Pfugers Archiv: European Journal of Physiology* 447(5): 465-548.  
659 doi:10.1007/s00424-003-1192-y.  
660
- 661 Hediger MA, Clemencon B, Burrier RE, Bruford EA. 2013. The ABCs of membrane transporters in  
662 health and disease (SLC series): introduction. *Molecular Aspects of Medicine* 34(2-3): 95-107. doi:  
663 10.1016/j.mam.2012.12.009.  
664
- 665 Hill RW, Veghte JH. 1976. Jackrabbit ears: surface temperatures and vascular responses. *Science*  
666 194(4263):436-8. Doi: 10.1126/science.982027
- 667 Hoekstra HE, Hirschmann RJ, Bunday RA, Insel PA, Crossland JP. 2006. A single amino acid mutation  
668 contributes to adaptive beach mouse color patterns. *Science* 313:101–104 DOI  
669 10.1126/science.1126121.  
670
- 671 Hohenlohe PA, Bassham S, Etter PD, Stiffler N, Johnson EA, Cresko WA. 2010. Population genomics  
672 of parallel adaptation in threespine stickleback using sequenced RAD Tags. *PLoS Genetics*  
673 6(2):e1000862 DOI 10.1371/journal.pgen.1000862.
- 674 Jiang H, Lei R, Ding S-W, Zhu S. 2014. Skewer: a fast and accurate adapter trimmer for next-generation  
675 sequencing paired-end reads. *BMC Bioinformatics* 15:182 (pp. 1-12). doi: 10.1186/1471-2015-15-182  
676
- 677 Jones FC, Grabherr MG, Chan YF, Russell P, Mauceli E, Johnson J, Swofford R, Pirun M, Zody MC,  
678 White S, Birney E, Searle S, Schmutz J, Grimwood J, Dickson MC, Myers RM, Miller CT, Summers  
679 BR, Knecht AK, Brady SD, Zhang H, Pollen AA, Howes T, Amemiya C, Broad Institute Genome  
680 Sequencing Platform & Whole Assembly Team, Lander ES, Di Palma F, Lindblad-Toh K, Kingsley  
681 DM. 2012. The genomic basis of adaptive evolution in threespine sticklebacks. *Nature* 484:55–61. DOI  
682 10.1038/nature10944.  
683
- 684 Jones JI, Clemmons DR. 2008. Insuline-like growth factors and their biding proteins: biological actions.  
685 *Endocrine Reviews* 16(1): doi: 10.1210/edrv-16-1-3



- 686 Kalabukhov NI. 1960. Comparative ecology of hibernating animals. Bulletin of the Museum of  
687 Comparative Zoology at Harvard 124: 45-74. Doi: N/A
- 688 Kawamura K, Kumagai J, Sudo S, Chun S-Y, Pisarska M, Morita H, Toppari J, Fu P, Wade JD,  
689 Bathgate RAD, Hsueh AJW. 2004. Paracrine regulation of mammalian oocyte maturation and male  
690 germ cell survival. Proceedings of the National Academy of Sciences 101(19): 7323-7328. Doi:  
691 10.1073.pnas.0307061101.
- 692 Kelt DA. 2011. Comparative ecology of desert small mammals: a selective review of the past 30 years.  
693 Journal of Mammalogy, 92(6):1158–1178. doi: <http://dx.doi.org/10.1644/10-MAMM-S-238.1>
- 694 King, John A., (editor). Biology of *Peromyscus* (Rodentia). Special Publication No. 2, The American  
695 Society of Mammalogists, xiii + 594 pp, 1968. Doi: 10.2307/1378817
- 696 Kordonowy LK, MacManes MD. 2016. Characterization of a male reproductive transcriptome for  
697 *Peromyscus eremicus* (cactus mouse). PeerJ 4:e2617(pp.1-23). Doi: 10.7717/peerj.2617.
- 698 Kordonowy L, Lombardo K, Green H, LaCourse S, Bolton E, MacManes M. 2016. Physiological and  
699 biochemical changes associated with experimental dehydration in the desert adapted cactus mouse, *Peromyscus*  
700 *eremicus*. BioRxiv. doi: <https://doi.org/10.1101/047704>
- 701 Kwon T-H, Frokiaer J, Nielsen S. 2013. Regulation of aquaporin-2 in the kidney: A molecular  
702 mechanism of body-water homeostasis. Kidney Research Clinical Practice 32(3): 96-1023. Doi:  
703 10.1016/j.krcp.2013.07.005.
- 704 Leijonhufvud P, Akerlof E, Pousette A. 1997. Structure of sperm activating protein. Molecular Human  
705 Reproduction 3(3): 249-253. Doi:10.1093/molehr/3.3.249.
- 706 Le Roith D. 1997. Insulin-like growth factors. The New England Journal of Medicine 336(9): 633-640.  
707 Doi: 10.1056/NEJM199702273360907
- 708 Li W, Godzik A. 2006. Cd-hit: a fast program for clustering and comparing large sets of protein or  
709 nucleotide sequences. Bioinformatics 22(13):1658-1659. Doi: 10.1093/bioinformatics/btl158.
- 710 Liu J, Li G, Chang Z, Yu T, Liu B McMullen R, Chen P, Huang X. 2016. BinPacker: packing-based *de*  
711 *novo* transcriptome assembly from RNA-seq data. PLoS Computational Biology 12(2):e1004772 (pp.1-  
712 15). Doi:10.1371/journal.pcbi.1004772.

- 713 Lorenzo FR, Huff C, Myllymäki M, Olenchok B, Swierczek S, Tashi T, Gordeuk V, Wuren T, Ri-Li G,  
714 McClain DA, Khan TM, Koul PA, Guchhait P, Salama ME, Xing J, Semenza GL, Liberzon E, Wilson  
715 A, Simonson TS, Jorde LB, Kaelin Jr WG, Koivunen P, Prchal JT. 2014. A genetic mechanism for  
716 Tibetan high-altitude adaptation. *Nature Genetics* 46(9):951–956 DOI 10.1038/ng.3067.
- 717 Love MI, Huber W, and Anders S. 2014. Moderated estimation of fold change and dispersion for RNA-  
718 seq data with DESeq2. *Genome Biology* 15:550 (pp. 1-21). Doi: 10.1186/s13059-014-0550-8.
- 719 MacManes MD. 2014. On the optimal trimming of high-throughput mRNA sequence data. *Frontiers in*  
720 *Genetics* 5:13 (pp.1-7). doi.org/10.3389/fgene.2014.00013.
- 721 MacManes MD. 2016. Establishing evidenced-based best practice for the de novo assembly and evaluation of  
722 transcriptomes from non-model organisms. bioRxiv. doi: 10.1101/035642.
- 723 MacManes MD, Eisen MB. 2014. Characterization of the transcriptome, nucleotide sequence  
724 polymorphism, and natural selection in the desert adapted mouse *Peromyscus eremicus*. *PeerJ* 2: e642.  
725 doi.org/10.7717/peerj.642.
- 726 MacMillen RE, Garland T Jr. in *Advances in the Study of Peromyscus (Rodentia)* (Texas Tech  
727 University Press, Lubbock, 1989, Kirkland LG Jr, Layne JN) 143-168.
- 728 MacMillen RE, Hinds DS. 1983. Water regulatory efficiency in heteromyid rodents: A model and its  
729 application. *Ecology* 64(1): 152-164. DOI: 10.2307/1937337
- 730 Madden T. 2002 Oct 9 [Updated 2003 Aug 13]. The BLAST Sequence Analysis Tool. In: McEntyre J,  
731 Ostell J, editors. *The NCBI Handbook* [Internet]. Bethesda (MD): National Center for Biotechnology  
732 Information (US); 2002-. Chapter 16. Available from: <http://www.ncbi.nlm.nih.gov/books/NBK21097/>
- 733 Marra NJ, Eo SH, Hale MC, Waser PM, DeWoody JA. 2012. *A priori* and *a posteriori* approaches for  
734 finding genes of evolutionary interest in non-model species: Osmoregulatory genes in the kidney  
735 transcriptome of the desert rodent *Dipodomys spectabilis* (banner-tailed kangaroo rat). *Comparative*  
736 *Biochemistry and Physiology, Part D: Genomics Proteomics* 7(4): 328-339. doi:  
737 10.1016/j.cbd.2012.07.001.

- 738 Marra NJ, Romero A, DeWoody A. 2014. Natural selection and the genetic basis of osmoregulation in  
739 heteromyid rodents as revealed by RNA-seq. *Molecular Ecology* 23(11): 2699-2711. doi:  
740 10.1111/mec.12764.
- 741 Martin K, Wiebe KL. 2004. Coping mechanisms of alpine and arctic breeding birds: extreme weather  
742 and limitations to reproductive resilience. *Integrative and Comparative Biology* 44(2):177-185. Doi:  
743 10.1093/icb/44.2.177.
- 744 McCarthy DJ, Chen Y, Smyth GK. 2012. Differential expression analysis of multifactor RNA-Seq  
745 experiments with respect to biological variation. *Nucleic Acids Research* 40(10): 4288-4297. Doi:  
746 10.1093/nar/gks042
- 747 Moniri NH. 2016. Free-fatty acid receptor-4 (GPR120): Cellular and molecular function and its role in  
748 metabolic disorders. *Biochemical Pharmacology* 110-111:1-15. doi:10.1016/j.bcp.2016.01.021
- 749 Moussad EE-DA, Brigstock DR. 2000. Connective Tissue Growth Factor: What's in a Name?  
750 *Molecular Genetics and Metabolism* 71: 276-292. Doi: 10.1006/mgme.2000.3059.
- 751 Munshi-South J, Richardson JL. 2016 *Peromyscus* transcriptomics: understanding adaptation and gene  
752 expression plasticity within and between species of deer mice. *Seminars in Cell & Developmental*  
753 *Biology in press* (pp.1-9). doi: 10.1016/j.semcd.2016.08.011
- 754 Nargund VH. 2015. Effects of psychological stress on male fertility. *Nature Reviews Urology* 12: 373-  
755 382. Doi: 10.1038/nrurol.2015.112
- 756 Oh J, Woo JM, Choi E, Kim T, Cho BN, Park ZY, Kim YC, Kim DH, Cho C. 2005. Molecular,  
757 biochemical, and cellular characterization of epididymal ADAMs, ADAM7 and ADAM28. *Biochemical*  
758 *and Biophysical Research Communications* 331(4):1374-1383. doi:10.1016/j.bbrc.2005.04.067
- 759 Pan D. 2010. The hippo signaling pathway in development and cancer. *Developmental Cell* 19(4): 491-  
760 505. Doi: 10.1016/j.devcel.2010.09.011.
- 761 Patro R, Duggal G, Kingsford C. 2015. Salmon: Accurate, Versatile and Ultrafast Quantification from  
762 RNA-seq Data using Lightweight-Alignment. bioRxiv 021592; doi: <http://dx.doi.org/10.1101/021592>.

- 763 R Core Team. 2016. R: A Language and Environment for Statistical Computing. R Foundation for  
764 Statistical Computing. Vienna, Austria. <https://www.R-project.org>
- 765 Robinson MD, McCarthy DJ, Smyth GK. 2010. edgeR: a Bioconductor package for differential  
766 expression analysis of digital gene expression data. *Bioinformatics* 26(1): 139-140. Doi:  
767 10.1093/bioinformatics.btp616.
- 768 Schiöth HB, Roshanbin S, Hägglund MG, Fredriksson R. 2013. Evolutionary origin of amino acid  
769 transporter families SLC32, SLC36 and SLC38 and physiological, pathological and therapeutic aspects.  
770 *Molecular Aspects of Medicine* 34(2-3): 571-585. Doi:10.1016/j.mam.2012.07.012
- 771 Schmidt-Nielsen K. in *Desert Animals: Physiological Problems of Heat and Water* (Oxford University  
772 Press, New York, 1964, Schmidt-Nielsen K.) 129-138.
- 773 Schmidt-Nielsen B, Schmidt-Nielsen K, Brokaw A, Schneiderman H. 1948. Water conservation in  
774 desert rodents. *Journal of Cellular Physiology* 32(3): 331-360. doi: 10.1002/jcp.1030320306.
- 775 Schmidt-Nielsen K, Schmidt-Nielsen B. 1952. Water metabolism of desert mammals 1. *Physiological*  
776 *Reviews* 32(2): 135-166. PMID: 1492697.
- 777 Schurch NJ, Schofield P, Gierliński M, Cole C, Sherstnev A, Singh V, Wrobel N, Gharbi K, Simpson  
778 GG, Owen-Hughes T, Blaxter M, Barton GJ. 2016. How many biological replicates are needed in an  
779 RNA-seq experiment and which differential expression tool should you use? *RNA* 22(6): 839-  
780 851. doi: 10.1261/rna.053959.115
- 781 Scott C. 2016. dammit: an open and accessible de novo transcriptome annotator.  
782 [www.camillescott.org/dammit](http://www.camillescott.org/dammit)
- 783 Sikes RS, Animal Care and Use Committee of the American Society of Mammalogists. 2016. 2016  
784 Guidelines of the American society of Mammalogists for the use of wild mammals in research and  
785 education. *Journal of Mammalogy* 97(3): 663-688. doi: 10.1093/jmammal/gyw078
- 786 Simão FA, Waterhouse RM, Ioannidis P, Kriventseva EV, Zdobnov EM. 2015. BUSCO: assessing  
787 genome assembly and annotation completeness with single-copy orthologs. *Bioinformatics* 31(19):  
788 3210-3212. doi: 10.1093/bioinformatics/btv351.

- 789 Smith-Unna R, Bournnell C, Patro R, Hibberd JM, Kelley S. 2016. TransRate: reference free quality  
790 assessment of de-novo transcriptome assemblies. *Genome Research* 26: 1134-1144. DOI:  
791 10.1101/gr.196469.115
- 792 Snel B, Lehmann G, Bork P, Huynen MA. 2000. STRING: a web-server to retrieve and display the  
793 repeatedly occurring neighbourhood of a gene. *Nucleic Acids Research*: 28(18):3442-3444.  
794 doi: 10.1093/nar/28.18.3442.
- 795 Somero GN. 2010. The physiology of climate change: how potentials for acclimatization and genetic  
796 adaptation will determine ‘winners’ and losers’. *Journal of Experimental Biology* 213:912-920. Doi:  
797 10/1242/jeb037473.  
798
- 799 Sonesson C, Love MI, Robinson MD. 2016. Differential analyses for RNA-seq: transcript-level estimates  
800 improve gene-level inferences. *F1000Research* 4:1521 (pp 1-19). Doi: 10.12688/f1000research.7563.2
- 801 Song L, Florea L. 2015. Rcorrector: efficient and accurate error correction for Illumina RNA-seq reads.  
802 *Gigascience* 4:48 (pp.1-8) doi: 10.1186/s13742-015-0089-y.
- 803 Stenmark H, Olkkonen VM. 2001. The Rab GTPase family. *Genome Biology* 2(5):pp.1-7. Doi:  
804 10.1186/gb-2001-2-5-reviews3007
- 805 Stevens RD, Tello JS. 2009. Micro- and macrohabitat associations in Mojave desert rodent  
806 communities. *Journal of Mammalogy* 90(2):388-403. Doi: 10.1644/08-MAMM-A-141.1
- 807 Storz JF, Runck AM, Moriyama H, Weber RE, Fago A. 2010. Genetic differences in hemoglobin  
808 function between highland and lowland deer mice. *Journal of Experimental Biology* 213(15):2565–2574  
809 DOI 10.1242/jeb.042598.
- 810 Szklarczyk D, Franceschini A, Wyder S, Forslund K, Heller D, Huerta-Cepas J, Simonovic M, Roth A,  
811 Santos A, Tsafou KP, Kuhn M, Bork P, Jensen LJ, von Mering C. 2015. STRING v10: protein-protein  
812 interaction networks, integrated over the tree of life. *Nucleic Acids Research* 43: D447-452. doi:  
813 10.1093/nar/gku1003.

- 814 Urity VB, Issaian T, Braun EJ, Dantzler WH, Pannabecker TL. 2012. Architecture of kangaroo rat inner  
815 medulla: segmentation of descending thin limb of Henle's loop. *American Journal of Physiology-*  
816 *Regulatory Integrative and Comparative Physiology* 302(6): R720-R726.  
817 doi:10.1152/ajpregu.00549.2011.
- 818 Veal R, Caire W. 1979. *Peromyscus eremicus*. *Mammalian Species* 118:1-6. Available at  
819 <http://www.science.smith.edu/msi/pdf/i0076-3519-118-01-0001.pdf>.
- 820 Vimtrup BJ, Schmidt-Nielsen B. 1952. The histology of the kidney of kangaroo rats. *The Anatomical*  
821 *Record* 114(4): 515-528. doi:10.1002/ar.1091140402.
- 822 Vitavska O, Wieczorek H. 2013. The SLC45 gene family of putative sugar transporters. *Molecular*  
823 *Aspects of Medicine* 34(2-3): 655-660. Doi:10.1016/j.mam.2012.05.014
- 824 Vorhies CT in *Water Requirements of Desert Animals in the Southwest*. (College of Agriculture,  
825 University of Arizona, Tucson, Agricultural Experiment Station.) Technical Bulletin No. 107: 487-525.  
826 <http://hdl.handle.net/10150/190625>
- 827 Wagner GF, Dimattia GE. 2006. The stanniocalcin family of proteins. *Journal of Experimental Zoology*  
828 *Part A* 305A(9): 769-780. Doi: 10.1002/jez.a.313  
829
- 830 Walsberg GE. 2000. Small mammals in hot deserts: some generalizations revisited. *BioScience* 50(2):  
831 109-120. doi: 10.1641/0006-3568(2000)050[0109:SMIHDS]2.3.C
- 832 Wingfield JC. 2013. The ecology of stress: ecological processes and the ecology of stress: the impacts of  
833 abiotic environmental factors. *Functional Ecology* 27:37-44. Doi: 10/1111/1365-2435.12039
- 834 Wingfield JC, Kelley JP, Angelier F. 2011. What are extreme environmental conditions and how do  
835 organisms cope with them? *Current Zoologist* 57(3):373-374. Doi: 10/1093/czoolo/57.3.363
- 836 Wingfield JC, Sapolsky RM. 2003. Reproduction and resistance to stress: when and how. *Journal of*  
837 *Neuroendocrinology* 15:711-724. doi/10.1046/j.1365-2826.2003.01033.x
- 838 Xiao X, Mruk DD, Cheng CY. 2013. Intercellular adhesion molecules (ICAMs) and spermatogenesis.  
839 *Human Reproduction Update* 19(2): 167-186. doi:10.1093/humupd/dms049.
